# Evidence for a biological source of widespread, reproducible nighttime oxygen spikes in tropical reef ecosystems has implications for coral health

\*S.K. Calhoun<sup>1</sup>, A.F. Haas<sup>2</sup>, Y. Takeshita<sup>8</sup>, M.D. Johnson<sup>3</sup>, M.D. Fox<sup>4</sup>, E.L.A. Kelly<sup>4</sup>, B. Mueller<sup>5,6</sup>, M.J.A. Vermeij<sup>5,6</sup>, L.W. Kelly<sup>1</sup>, C.E. Nelson<sup>7</sup>, N. N. Price<sup>9</sup>, T.N.F. Roach<sup>1,10,11</sup>, F.L. Rohwer<sup>1</sup>, J.E. Smith<sup>4</sup>

<sup>1</sup> Department of Biology, San Diego State University, San Diego, CA, United States

<sup>2</sup> Department of Marine Microbiology and Biogeochemistry, NIOZ Royal Netherlands Institute for Sea Research and Utrecht University, Texel, Netherlands

<sup>3</sup> Smithsonian Tropical Research Institute, Republic of Panamá

<sup>4</sup> Scripps Institution of Oceanography, University of California San Diego, La Jolla, CA, United States

<sup>5</sup> Caribbean Research and Management of Biodiversity (CARMABI), Willemstad, Curaçao

<sup>6</sup> Freshwater and Marine Ecology, University of Amsterdam, Amsterdam, Netherlands

<sup>7</sup> Center for Microbial Oceanography, University of Hawai'i at Mānoa

<sup>8</sup> Monterey Bay Aquarium Research Institute, Moss Landing, CA, USA

<sup>9</sup> Bigelow Laboratory for Ocean Sciences, East Boothbay, ME, United States

<sup>10</sup> Hawai'i Institute of Marine Biology, Kāne'ohe, HI, United States

<sup>11</sup> Biosphere 2, University of Arizona, Oracle, AZ, United States

Corresponding Author:

S.K. Calhoun<sup>1</sup>

5500 Campanile Dr, San Diego, CA 92182

Email address: [sandi.calhoun@gmail.com](mailto:sandi.calhoun@gmail.com)

## Abstract

Primary producers release oxygen as the by-product of photosynthetic light reactions during the day. However, a prevalent, globally-occurring nighttime spike in dissolved oxygen in the absence of light challenges the traditional assumption that biological oxygen production is limited to daylight hours, particularly in tropical coral reefs. Here we show: 1) the widespread nature of this phenomenon, 2) its reproducibility across tropical marine ecosystems, 3) the influence of biotic and abiotic factors on this phenomenon across numerous datasets, and 4) the observation of nighttime oxygen spikes *in vitro* from incubations of coral reef benthic organisms. The data from this study demonstrate that in addition to physical forcing, biological processes are likely responsible for increasing dissolved oxygen at night. Additionally, we demonstrate an association between these nighttime oxygen spikes and measures of both net community calcification and net community production. These results suggest that nighttime oxygen spikes are likely a biological response associated with increased respiration and are most prominent in communities dominated by calcifying organisms.

## Introduction

42           Between 50% and 85% of the free oxygen on Earth is produced by marine photosynthetic  
43 organisms (Tappan, 1968). While a large fraction of this production is attributed to open ocean  
44 phytoplankton, the productivity of benthic organisms often exceeds that of phytoplankton in  
45 shallow nearshore systems (MacIntyre, Geider & Miller, 1996; Dagggers et al., 2018). Studies  
46 quantifying ecosystem metabolism in tropical coastal environments have historically measured  
47 net community production (NCP) using flow respirometry (Odum, 1957; Kinsey, 1985; Kraines  
48 et al., 1996) or incubation experiments (Sournia, 1976; Kraines et al., 1998). These studies have  
49 increased our general understanding of the photosynthesis-respiration equilibrium (Del Giorgio  
50 & Williams, 2007). However, they frequently lacked the temporal resolution (a few  
51 measurements per day versus one measurement every few min) and extended duration (a single  
52 day versus multiple consecutive days to months) needed to accurately identify the ecological  
53 processes driving oxygen budgets in nearshore marine ecosystems. Progress toward resolving  
54 this issue was achieved with the development of autonomous dissolved oxygen (DO) sensors  
55 (e.g., electrodes and optodes) that have produced numerous high-resolution *in situ* DO  
56 measurements in recent decades (Falter et al., 2008; Fischer & Koop-Jakobsen, 2012; Long et  
57 al., 2013; Haas et al., 2013a). Extensive DO time series data are now available for shallow, near-  
58 shore environments around the world (Viaroli & Christian, 2004; Krumme, Herbeck & Wang,  
59 2012; Rheuban, Berg & McGlathery, 2014). The analysis and interpretation of these time series  
60 data sets is often complex because *in situ* DO concentrations depend on a multitude of known  
61 (e.g., light availability, hydrodynamics) and unknown factors (Reimers et al., 2012).  
62 Consequently, certain unexpected characteristics of such time series have remained unexplained  
63 or dismissed as equipment failure or anomalies.

64           One such feature of many DO time series from coral reefs and to a lesser extent other  
65 shallow, near-shore marine systems around the globe is a distinctive, pulsed increase in DO  
66 concentration at night. During such increases, or spikes, DO concentrations at night can increase  
67 to 35  $\mu\text{mol kg}^{-1}$  (equivalent to 1.1  $\text{mg l}^{-1}$ ) above background nighttime DO concentrations before  
68 decreasing again. In some cases, increased DO concentrations during these nightly spikes are one  
69 quarter the magnitude of daytime DO increase. Because it is generally accepted that oxygen  
70 production in the marine environment can only occur in the presence of photosynthetically active  
71 radiation (PAR) (Canfield, 2013; Lyons, Reinhard & Planavsky, 2014), these nighttime spikes  
72 were attributed to physical processes such as tidal bores, groundwater intrusion, upwelling,  
73 mixing, or thermal stratification in the water column (Kayanne et al., 2008; Takeshita et al.,  
74 2018). However, an allochthonous input of oxygen will always skew any estimate of ecosystem  
75 respiration that relies exclusively on measurements of oxygen consumption if a physical or  
76 biological origin for that oxygen is not properly accounted for (Del Giorgio & Williams, 2007).  
77 Since the DO spike at night is omitted in the classical view of biological oxygen production only  
78 being possible during the day, it is often excluded, leading to a potential underestimation of the  
79 actual biological oxygen present.

80           Mechanisms for biological oxygen production outside of PAR-driven photosynthesis  
81 have been proposed in recent years and serve as potential alternative explanations for nightly  
82 increases in DO concentrations, in addition to seemingly more obvious physical drivers:

83 - *Oxygenic chlorite detoxification* by perchlorate-respiring bacteria and *oxygenic nitrite*  
84 *reduction* by the recently identified bacterium *Methylomirabilis oxyfera* (Ettwig et al., 2010,  
85 2012; Schaffner et al., 2015). Schaffner and colleagues (2015) report on a chlorite dismutase

86 enzyme cloned from the cyanobacterium *Cyanothece sp.* PCC7425 that can generate nearly 40  
87  $\mu\text{M}$  of  $\text{DO s}^{-1}$  in the presence of 1,000  $\mu\text{M}$  chlorite. However, this enzyme is optimally active at  
88 pH 4.0, and minimally active to inactive above pH 7.0. The authors additionally conclude that  
89 most, if not all chlorite dismutase enzymes are optimally active at pH 6.5 or less. Ettwig et al.  
90 (2010) show that methane oxidation is coupled to oxygenic nitrite reduction in the bacterium *M.*  
91 *oxyfera*, isolated from anaerobic sediments. Their experimental setup demonstrated up to 70  
92 nmol of DO generated over 6-8 hours by *M. oxyfera* from a substrate containing 2 mM nitrite.  
93 However, the substrate used to produce this quantity of oxygen also contained propylene, as little  
94 measurable oxygen was generated from a methane substrate (the bacteria's preferred carbon  
95 source which is metabolized via consumption of generated oxygen). Overall, for oxygenic  
96 processes involving either nitrite or chlorite to be responsible for nighttime DO spikes on coral  
97 reefs, either compound (or [per]chlorate) would need to be present in millimolar quantities,  
98 which has to date not been shown.

99 - *Far-red light photosynthesis* (Gan & Bryant, 2015). Far-red light photosynthesis in  
100 cyanobacteria has been proposed over the last decade as an adaptation to environments enriched  
101 in light with wavelengths greater than 700 nm, well outside the normal PAR spectrum. Such  
102 environments include benthic surfaces shaded by other photosynthesizers, interior layers of  
103 stromatolites and biofilms, karst caves, and sediments (Averina et al., 2018). Gan et al. (2014)  
104 used a systems biology approach to describe the cyanobacterium *Leptolyngbya sp.* strain JSC-1  
105 and its adaptation to far-red light by synthesizing two different types of chlorophyll: Chl *d* and  
106 Chl *f*. Not only did this cyanobacterium remodel its photosynthetic pathway under far-red light, it  
107 grew well, leading the authors to conclude that it was both producing oxygen and fixing carbon  
108 as if it were exposed to light in the normal PAR spectrum. However, far-red light has very poor  
109 penetration in the water column, limited to 10 m depths or less, and is predominantly available  
110 during the day (Gan & Bryant, 2015).

111 - *Reactive oxygen species (ROS) detoxification*. ROS can regenerate molecular oxygen from  
112 oxygen radicals and hydrogen peroxide produced during aerobic respiration (Guzy &  
113 Schumacker, 2006). Corals have recently been documented to release up to 1.8  $\mu\text{M}$  of hydrogen  
114 peroxide ( $\text{H}_2\text{O}_2$ ) over a period of 20 min when exposed to physio-chemical stimuli such as  
115 occurs during filter feeding (Armoza-Zvuloni et al., 2016). The half-life of  $\text{H}_2\text{O}_2$  in marine  
116 environments is estimated to be on the order of hours to days, with up to 80% of its breakdown  
117 occurring via microbial-derived catalase (Zinser, 2018). Assuming these parameters, an  
118 estimated 0.7  $\mu\text{M}$  of oxygen could potentially be produced via  $\text{H}_2\text{O}_2$  diffusion into and DO  
119 diffusion out of microbial cells over the course of a night (assuming the catalase reaction  
120 stoichiometry of  $2 \text{H}_2\text{O}_2 \rightarrow 2 \text{H}_2\text{O} + 1 \text{O}_2$ ).

121 Several possibilities thus exist for biological oxygen production in the absence of PAR.  
122 In this study, we describe nighttime DO spikes occurring on coral reefs around the world and  
123 explore potential mechanisms for their biological origin. We reviewed the literature and  
124 conducted *in situ* DO time series, mesocosm experiments *in situ*, and controlled laboratory  
125 experiments *in vitro*. Several statistical modeling approaches were used to elucidate drivers of  
126 DO spike occurrence and describe features of the DO spikes themselves, namely the height of  
127 the spikes and times of occurrence. Data collected concurrently with DO measurements (e.g.,  
128 pH, temperature, and water current profiles) and more infrequent measurements (e.g., total  
129 alkalinity, dissolved inorganic carbon, and offshore hydrodynamic and weather parameters) were

130 combined in these models, to determine if nighttime DO spikes are widespread, frequent, and  
131 explainable by single or combinations of physical and environmental variables. We found that a  
132 limited set of closely-linked, biologically-mediated variables can accurately describe nighttime  
133 spikes in DO. Furthermore, nighttime spikes in DO were observed under controlled laboratory  
134 conditions, ruling out many physical forcings (e.g., tidal flux... etc.). These findings are then  
135 discussed in the context of ongoing threats to coral reef health and the overall implications of  
136 biological oxygen release at night.

## 137 **Methods**

### 138 **Review of Literature**

139 We performed an extensive literature search to determine the prevalence of nighttime  
140 spikes in DO from published *in situ* time series datasets. In total, >3000 papers were reviewed  
141 using ISI Web of Science, Google Scholar, and the University of California San Diego Research  
142 Data Collections (<http://library.ucsd.edu/dc/rdcp/collections>) with the keywords ‘coral oxygen’,  
143 ‘marine nighttime oxygen’, ‘marine oxygen’, ‘aquatic oxygen’, and ‘marine calcification’ with  
144 publication dates between 1970 and 2015. Visually screening published figures was found to be  
145 the most efficient high-throughput method of determining whether or not a publication contained  
146 DO time series data that spanned both day and night times with high enough resolution to  
147 observe a nighttime DO spike. Up to the first 1,000 publication hits for each keyword phrase  
148 were screened for figures of *in situ* DO time series plots with three or more consecutive time-  
149 point measurements per night spanning at least 24 hours. After identifying plots that met our  
150 criteria, we distinguished nighttime DO spikes in those plots as DO concentration increases in  
151 the absence of PAR, lasting at least one hour before decreasing again. In total, 28 (20 temperate,  
152 8 tropical) relevant datasets were identified, where 19 showed an increase and subsequent  
153 decrease in DO at night generally lasting 4-6 hours (Table S1).

### 154 **Datasets Used for Statistical Analyses**

155 Our *in situ* datasets represent autonomous multi-sensor sonde (hereafter referred to as  
156 ‘sensor’) deployments across the central Pacific and Caribbean basins spanning the years 2010 -  
157 2015. DO datasets were obtained from enclosures deployed during September 2011 on the island  
158 of Mo’orea, French Polynesia using a single sensor inside collapsible benthic isolation tents  
159 (cBITs - Figure S1, after Haas et al. (2013)). A similar method was used in 2010 and 2013 in the  
160 Line Islands (11 Pacific islands stretching 2,350 km northwest-southeast across the equator),  
161 hereafter referred to as the Line Islands cBIT data set. *In situ* DO and temperature surveys (i.e.,  
162 sensor deployments where no enclosure was used) were taken in September, 2014 at Palmyra  
163 Atoll in the northern Line Islands (Takeshita et al., 2016), hereafter referred to as the Palmyra  
164 BEAMS (Benthic Ecosystem and Acidification Measurement System) dataset, and in May, 2015  
165 on the island of Curaçao in the southern Caribbean. Additional measurements of percent benthic  
166 cover, total alkalinity (TA), and dissolved inorganic carbon (DIC) were taken for the Line  
167 Islands cBIT and Palmyra BEAMS data sets. The saturation state of aragonite ( $\Omega$  aragonite) was  
168 calculated from daily TA and DIC samples for each data set, as described under the heading for  
169 each.

170 *Line Islands cBITs 2010 and 2013* The Northern Line Islands consist of 5 individual islands  
171 spanning latitudes from 6°24’N to 1°53’N in a northwest to southeast trend. Atoll and fringing

172 reef structures dominate the marine terrain around each, consistent with the whole of the Line  
173 Islands chain. Research was conducted across these islands from October 24 to November 23,  
174 2010 using the cBIT setup previously described (Figure S1), with a mean ( $\pm$  standard deviation  
175 [SD]) daily PAR measurement of  $328 \pm 175 \mu\text{mol photons m}^{-1} \text{s}^{-1}$  and water temperature of  $26.5$   
176  $\pm 1.3$  °C collected at 5 min intervals and 10 m depth using a LICOR (LI-COR, Inc.,  
177 [www.licor.com](http://www.licor.com)) and a MANTA multiprobe sonde (configured the same as the Mo'orea cBIT  
178 deployments), respectively. The Southern Line Islands are an additional 6 islands of the Line  
179 Islands chain spanning 0°22'S to 11°26'S, making the whole of the Line Islands one of the  
180 longest island chains in the world (2,350 km from north to south). Research studies were  
181 conducted across these islands from October 18 to November 6, 2013, with a mean  $\pm$  SD daily  
182 PAR measurement of  $312 \pm 214 \mu\text{mol photons m}^{-1} \text{s}^{-1}$  and water temperature of  $28.1 \pm 0.5$  °C  
183 (collected as described for the Northern Line Islands). cBITs, each containing one multi-probe  
184 sonde, were deployed at 10 m on the fore-reef habitat in all the Line Islands (6 cBITs per island,  
185 across 11 islands). Percent benthic cover was estimated from photoquadrats, and the percentages  
186 for various organisms classified as either 'Calcifiers' (calcifying algae such as *Halimeda* sp.,  
187 crustose coralline algae, and hard corals), or 'Non-Calcifiers' (fleshy macroalgae, turf algae, soft  
188 corals, and corallimorphs). TA and DIC samples were collected on 24-hour intervals starting  
189 midday following the procedure outlined by Haas et al. (2013), where a pump was placed inside  
190 the cBIT and a line fed out of the cBIT underneath the skirt. Water samples were placed in 300  
191 ml borosilicate glass containers, poisoned with mercuric chloride, and sealed with glass stoppers.  
192 TA and DIC were analyzed using standard procedures (Dickson et al., 2007). pH on the total  
193 scale and  $\Omega$  aragonite were calculated using CO2SYS with equilibrium constants from Lueker,  
194 Dickson & Keeling (2000).

195 *Palmyra BEAMS 2014* A single island research study was carried out from September 8 to 24,  
196 2014 on Palmyra Atoll, the second northernmost island of the Line Islands (5°52'N 162°6'W) as  
197 previously described (Takeshita et al., 2016). Briefly, a benthic flux method was used to  
198 determine the vertical gradients of DO and pH starting at the benthos. These data was then used  
199 to calculate time series fluxes of net community production (NCP, using the gradient of DO),  
200 and net community calcification (NCC, using the gradient of pH). Water current speed and  
201 direction measurements were also made alongside the vertical gradient measurements, and  
202 subsequently used in the calculation of NCP and NCC. A time series of  $\Omega$  aragonite was also  
203 calculated from the gradient of pH and verified by daily TA and DIC measurements as described  
204 by Takeshita et al. (2016). Percent benthic cover was estimated from photoquadrats, and the  
205 percentages for various organisms binned into 'Calcifiers' or 'Non-Calcifiers' as described for  
206 the Line Islands cBIT data. These additional variables make this data set the most comprehensive  
207 data presented here in terms of site level physical and biological variables.

208 *Mo'orea cBIT* Sites at the island of Mo'orea (17°48'S 149°84'W) were monitored from  
209 September 1 through 22, 2011. cBITs were deployed for 36 hours at 5 m depth on the back reef  
210 habitat of Mo'orea for the purpose of isolating the benthic water column from the surrounding  
211 seawater, after the methods described by (Haas et al., 2013b). Briefly, each cBIT contained a  
212 MANTA multiprobe sonde (Eureka Water Probes, [www.waterprobes.com](http://www.waterprobes.com)) with sensors  
213 measuring and logging pH, redox potential (ORP), conductivity, dissolved oxygen (DO), and  
214 temperature on 5 min intervals.

215 *Curaçao* The island of Curaçao (12°7'N 68°56'W) is located approximately 64 km northeast of  
216 the Venezuelan coast on the southernmost edge of the Caribbean tectonic plate. It is a semi-arid  
217 island surrounded by fringing reefs, with greater coral diversity and coral coverage than much of  
218 the Caribbean. Research on this island was conducted out of the CARMABI Research Station  
219 from April 14 to May 28, 2015. A mean  $\pm$  SD temperature of  $26.7 \pm 0.1$  °C was collected as  
220 described for the previous islands. A single MANTA multiprobe sonde was deployed in Curaçao  
221 at 10 m of depth approximately 200 m offshore of a desalinization plant located at 12°6'N,  
222 68°57'W. The MANTA was set up to autonomously log parameters per the deployment for  
223 Mo'orea and the Line Islands, with the exception that no cBITs were used. No PAR data was  
224 taken due to the lack of an appropriate PAR sensor during this expedition.

## 225 Physical and meteorological data

226 Oceanographic and meteorological data were used to assess the contribution of global  
227 scale physical processes. NOAA weather buoy data (<http://www.ndbc.noaa.gov>) from buoys  
228 stationed at 155°W and 8°N-8°S over the dates listed for Northern and Southern Line Islands  
229 cBIT deployments was used to obtain pressure at 300 and 500 m of seawater depth (indicative of  
230 potential offshore currents/upwelling), as well as wind speed and direction. Moon phase and  
231 intensity data were obtained from naval astronomical charts  
232 (<http://aa.usno.navy.mil/data/docs/MoonPhase.php>) and used as a proxy for both tidal forcing  
233 and moonlight.

## 234 Statistical Analysis of Datasets

235 All time series data were analyzed using MatLab (R2018a, MathWorks, Inc.  
236 <https://www.mathworks.com>) and R (v3.5.1, R Core Team, <https://www.R-project.org/>). DO  
237 concentrations in  $\mu\text{mol kg}^{-1}$  seawater mass (the oceanographic standard unit for DO) were  
238 calculated from percent saturation, temperature and conductivity measurements using functions  
239 from SEAWATER Library v. 3.3 ([http://www.cmar.csiro.au/datacentre/ext\\_docs/seawater.htm](http://www.cmar.csiro.au/datacentre/ext_docs/seawater.htm))  
240 and Gibbs Seawater Oceanographic Toolbox ([http://www.teos-  
241 10.org/pubs/gsw/html/gsw\\_contents.html](http://www.teos-10.org/pubs/gsw/html/gsw_contents.html)). For reference, DO values between 200 and 210  $\mu\text{mol}$   
242  $\text{kg}^{-1}$  are equivalent to 100% air saturation at temperatures normally observed in tropical seawater  
243 (from 28 to 24 °C, respectively). Data collected via MANTA sondes were normalized to the  
244 overall average of the first 30 min of all six sensors in the Line Islands deployments (using  
245 cBITs). Additionally, daily pH values on the total  $\text{H}^+$  ion scale were used to calibrate the pH time  
246 series by baseline regression between each discreet pH value.

247 Data in each time series data set were collected at different time intervals and at the site  
248 (at the location of the sensor/sampling) or island level (one set of data points for an entire island  
249 or many islands) (Table S2). In order to analyze all data together, time points were linearly  
250 interpolated onto the most frequent time scale for hourly and daily time points.

## 251 Nighttime DO Spike Identification

252 An algorithm for defining a nighttime DO spike was empirically derived based on DO  
253 spike parameters observed in the literature and the data sets presented in this study. Time series  
254 data were separated into night and day times using either PAR values or sunset and sunrise  
255 times, and then smoothed to reduce noise using a moving average filter with a sliding window of

256 2 hours (Figure S2A). Next all nighttime DO spikes with a prominence (height) greater than or  
257 equal to  $0.5 \mu\text{mol kg}^{-1}$  and a duration (defined as the width of the spike at half its height, Figure  
258 S2B) of at least 1 hour were identified computationally using MatLab function `findpeaks`. A  
259 value of  $0.5 \mu\text{mol kg}^{-1}$  was selected as the smallest possible spike height that was at least double  
260 the maximum sensitivity threshold of the DO sensors used (sensitivity threshold of  $0.2 \mu\text{mol kg}^{-1}$   
261 for MANTA multi-probe sondes used in all data sets except Palmyra 2014;  $0.1 \mu\text{mol kg}^{-1}$  as  
262 reported by Takeshita *et al.* for the Palmyra 2014 data). Data analyzed using this algorithm were  
263 manually checked to determine the validity of any identified nighttime DO spikes. Varying  
264 height and duration values, as well as the size of the time series smoothing window did not  
265 change the algorithm's ability to reliably detect a spike in DO concentration.

## 266 Data Patterns at the Time of a DO Spike

267 To test potential mechanisms underlying nighttime DO spikes, we utilized a suite of data  
268 collected *in situ* concurrently with DO. The simultaneous change of various oceanographic  
269 parameters such as temperature, salinity, current direction and current speed could indicate  
270 whether or not an DO spike coincides with changes in the overlying water mass (Kayanne *et al.*,  
271 2008). Variables such as benthic cover, DO and PAR data from the previous day, and pH  
272 changes associated with biological activity (such as calcification) could also lead to a biological  
273 source of nighttime DO spikes. Therefore, we analyzed our own datasets to assess whether the  
274 presence or absence of nighttime DO spikes could be classified using measurements of multiple  
275 variables at the exact time of a spike. Calculating the first ( $\Delta$ ) and second ( $\Delta\Delta$ ) derivatives of  
276 these variables allowed the degree of change occurring, the time of local maxima or minima, and  
277 the time of inflection points to be taken into account as well (Figure S3). Additional discrete  
278 values for benthic cover, as well as DO and PAR data from the previous day were included.

279 *Random forests.* Random forests analysis utilizes multiple tree-clustering algorithms to select the  
280 most important parameters when predicting values for numerical regression or classification  
281 based on non-numerical data. One major benefit of this method is that it does not require any *a*  
282 *priori* information about the distribution or frequency of values in a dataset, unlike many linear  
283 modeling approaches. When carried out with multiple permutations of the data, a probability for  
284 how reliable the results are can also be obtained. This technique was employed to discover  
285 which, if any variables might be able to best predict the presence or absence of a DO spike. After  
286 identifying the most prominent DO spike per night across all datasets, all data values at the times  
287 of these spikes were used as potential classification predictors for DO spike occurrence. The  
288 frequency of nighttime DO spikes for a particular time series set (e.g., all time series data for one  
289 site) was binned into 1-hour time points across a 12-hour time span (sunset to sunrise). A time  
290 point that represents the middle of the most frequent time bin was used as a proxy for the time of  
291 a DO spike on nights where no spike was identified. Values at these time points were used as  
292 predictors for the absence of a DO spike. The first and second derivatives of time series  
293 variables, as well as nightly sums of variables (total amount measured per night as determined by  
294 numerical integration of the area under the curve), and values from the previous day (mean DO,  
295 mean PAR, and the ratio of integrated daily DO to integrated daily PAR) were also included.  
296 Percentages of benthic cover estimated from photoquadrats were included as discrete values for  
297 each site.

298 Combining datasets increased the power of analyses while testing potential drivers  
299 across as many examples of nighttime DO spikes as possible. The Line Islands cBITs and  
300 Palmyra BEAMS datasets were combined due to the large number of variables each have in  
301 common (Table S2). However, no percent benthic cover,  $\Omega$  aragonite, or NOAA buoy data were  
302 available for the Mo'orea or Curaçao datasets, limiting any assessment of potential drivers to pH,  
303 temperature, and DO. Therefore, these two datasets were screened for nighttime DO spikes, but  
304 ultimately not used for further analyses.

305 Random forests classification analysis was performed using package rfPermute in R  
306 (Archer, 2019). Presence/absence predictor data were analyzed using 3000 permutations, and  
307 significant p-values ( $< 0.05$ ) for all predictors calculated. Overall strength of the classification  
308 analysis was assessed using the out-of-bag error rate (i.e., the rate of misclassification).  
309 Classification was performed at the site level and site-plus-island level in order to reduce any  
310 bias caused by uniformity of island level variables across individual sites. The top predictors in  
311 terms of mean decrease in accuracy of classification (i.e., if such predictor was excluded) and  
312 significance were then selected and used as the only predictors for a second round of random  
313 forests classification. Those predictors that retained a high value of the mean decrease in  
314 accuracy score were then considered top predictors.

315 *Structural equation models.* An advantage of the random forests analysis as employed here is the  
316 ability to select potentially important variables *a priori* from a large data set for further analysis.  
317 Using the top predictors of DO spike occurrence, more detailed models were constructed that  
318 combined multiple variables into nested structures to analyze interactions between variables in  
319 what is known as a structural equation model (SEM) (Lefcheck, 2016). These top predictors  
320 were subsequently used as both predictors and response variables in a set of linear mixed effects  
321 models for the same presence/absence data. Original data (not the first and second derivatives or  
322 any ratios) were transformed via hyperbolic arcsine and derivatives and ratios were scaled by one  
323 or two orders of magnitude to provide a better fit for linear modeling. Correlations between pairs  
324 of variables per site were penalized using a spherical correlation matrix based on latitude,  
325 longitude and individual site designation (R package nlme, function corSphere). Island name was  
326 used as a random effect for all models. A set of nested models were constructed, starting with  
327 presence/absence as the response for a generalized linear mixed-effects model using a binomial  
328 distribution (R package lme4, function glmer). The top predictors from random forests  
329 classification were used as the predictors in this model. Each top predictor was also used as the  
330 response variable in a linear mixed-effects model with a Gaussian distribution (R package lme4,  
331 function lme). Q-Q plots of the residuals in each model were used to confirm a Gaussian  
332 distribution. The predictors for these models were selected from the remaining variables in the  
333 data. Each model was then combined into a structural equation model (R package  
334 piecewiseSEM) to assess the influence each predictor has on each response variable. Predictors  
335 were added or removed from models based on their significance and coefficient strength using  
336 the missing paths predicted from the structural equation model. Models were optimized using  
337 this missing paths strategy to achieve the highest possible conditional r-squared value (the ratio  
338 of variance in the data explained by both the fixed and random effects in the model) and the  
339 lowest possible Aikake information criteria score (AIC) (Shipley, 2013). A similar process was  
340 carried out on only the data with a DO spike present, using height and time as response variables  
341 in two separate starting models instead of presence/absence.



342 *Robust linear regression.* Robust linear regressions were performed with pairs of variables  
343 selected from the SEM analyses with estimation using Tukey's biweight (R package MASS,  
344 function `rlm`) (Venables & Ripley, 2002) and corresponding bootstrapped 90th percentile and  
345 95th percentile confidence intervals (90% and 95% CIs) for the slope using 1,000 bootstrap  
346 replications. Confidence intervals (CIs) for the robust regression analyses only describe the  
347 confidence in the slope of the regression line. If the CIs at 90% and 95% include zero, this means  
348 that a basic description of the slope as either negative or positive cannot be made. The robust  
349 regression itself can still draw a best fit line indicating a linear relationship, but the reliability of  
350 said line's slope cannot be ascertained without bootstrapped CIs. Regression lines are drawn as  
351 solid lines if the CIs at either 90% or 95% do not include zero, while a dashed line indicates the  
352 inclusion of zero in both CIs.

### 353 Laboratory Incubations Using Wild and Cultured Reef Organisms

354 To determine if nighttime DO spikes observed *in situ* could be isolated in the laboratory,  
355 incubations were carried out using both wild collected and aquarium-cultured reef organisms.  
356 Wild collected organisms were obtained from the reefs of Curaçao during two separate sets of  
357 experiments, the first over April-May, 2015 and the second April-May, 2016. Aquarium-cultured  
358 Coral fragments reared for aquaculture purposes were grown in a 1,000 gal recirculating artificial  
359 reef system at San Diego State University, San Diego, USA for 6 months and used for incubation  
360 experiments over February-March, 2018.

361 Transparent polycarbonate tube design, with rubber gasket sealed lids on either end were  
362 used as incubation tanks. Each incubation tank measured 7.5 cm in diameter by up to 50 cm tall  
363 and held volumes of 2, 1.5 and 1 l of seawater. Different incubation tank volumes were used for  
364 different amounts of organism biomass (estimated from seawater displacement volume) and to  
365 accommodate different sensor and water bath sizes. Tanks were installed in a temperature-  
366 controlled water bath that was placed in a temperature-controlled room (mean  $\pm$  SD of  $24.0 \pm 0.5$   
367  $^{\circ}\text{C}$  for the water bath used in Curaçao, and  $25.0 \pm 0.5$   $^{\circ}\text{C}$  for water baths used at SDSU). No  
368 external or internal water flow was allowed in any incubation tank during the incubation period  
369 to minimize the possibility of introducing external oxygen. For dark incubations, light intensity  
370 measured inside the water bath by HOBO data loggers showed 0.0 lux, an effectively lightless  
371 environment. Diurnal light cycle incubations were carried out in a fully dark environment with  
372 all light coming from a combination of LED and T4 fluorescent lights on a 12-hour cycle (Figure  
373 S4).

374 Multiple sensor types were deployed to measure DO and temperature during the  
375 incubations. These included MANTA multisensor sondes (sensitivity thresholds of  $0.2 \mu\text{mol DO}$   
376  $\text{kg}^{-1}$  and  $0.01$   $^{\circ}\text{C}$ ), a single-channel fiber-optic oxygen sensor ([sensitivity threshold of  $0.25 \mu\text{mol}$   
377  $\text{DO kg}^{-1}$ ] PreSens Precision Sensing GmbH, [www.presens.de](http://www.presens.de)) combined with a HOBO  
378 temperature logger ([sensitivity threshold of  $0.14$   $^{\circ}\text{C}$ ] HOBO Pendant Temperature/Light 8K  
379 Data Logger, Onset Computer Corp., [www.onset.com](http://www.onset.com)), and a handheld optical sensor set to  
380 continuously log measurements ([sensitivity thresholds of  $0.2 \mu\text{mol DO kg}^{-1}$  and  $0.1$   $^{\circ}\text{C}$ ] HACH  
381 HDQ Portable Meter with optical oxygen sensor, HACH Company, [www.hach.com](http://www.hach.com)).

382 Several different benthic components were collected from the reefs of Curaçao and  
383 brought into the lab during April-May, 2015. Benthic components included: fine grained  
384 sand/sediment ('Sediment'), dead coral rubble covered in turf algae ('Turf'), bare dead coral

385 rubble ('Rubble'), crustose coralline algae ('CCA'), and a mix of the aforementioned benthic  
386 components (25% of each) ('Mixed') (See Table S4 for a list of all samples incubated). Sample  
387 composition was determined by visual assessment of the surface area of the sample, where the  
388 sample was classified as one of the five types per the dominant (>75% of surface area) sample  
389 type present. Benthic samples comprising the five basic types listed were collected from varying  
390 depths at several locations across the island of Curaçao (Table S9 & S11). All samples were  
391 collected in polycarbonate incubation tubes filled with natural seawater, sealed and transported  
392 to CARMABI research station where they were immediately transferred to new incubation tubes  
393 filled with seawater from the flow-through system and placed in the incubation chamber, except  
394 for certain CCA samples. CCA samples collected deeper than the intertidal zone were allowed to  
395 recover for 48 hours in a low-light aquarium with flow before experiment began in order to  
396 minimize the stress of being chiseled off the reef during collection. No other samples were  
397 collected by chiseling.

398 Differences in volumetric displacement (a rough proxy for biomass) were used for each  
399 benthic type to determine if the nighttime DO spikes occurred due to a specific volume of sample  
400 material. Samples were either incubated in singlet, duplicate or triplicate depending on the  
401 amount of sample available. A total of four control samples were incubated: a tap-water control  
402 to check the abiotic DO to temperature correlation, a water column control collected from the  
403 reef at 10 m depth, and a water column control from the surface water to observe the DO  
404 variability in the water column alone. Furthermore, dry rubble exposed to direct sunlight for 12  
405 hours then submerged in seawater was used to determine whether DO changes resulted from  
406 rubble removed from a typical reef system. Tubes were oriented vertically with a sealed bottom  
407 lid and open top for access by the sensors. Additionally, the surface area of the seawater inside  
408 each tank exposed to air was minimized as best as possible by the position of the sensors at the  
409 top and vertical orientation of each tube, blocking direct seawater-air contact.

410 A similar incubation setup was used during the incubation experiments carried out over  
411 April-May, 2016. Incubation chambers were similar as before but could be fully sealed using  
412 customized lids that allowed either a fiber-optic optode (PreSens) or a multisensor sonde  
413 (MANTA) to be placed in a fitted port in the lid. This ensured the creation of an air tight seal,  
414 verified by incubating deoxygenated water for 12 hours. Total chamber volumes were 1 l for the  
415 chambers using a PreSens optode and 1.5 l for those using a MANTA array. This was done to  
416 help compensate for water displaced by the relatively large MANTA array compared to that of  
417 the thin fiber-optic optodes. The incubation chambers were placed vertically in a water bath  
418 covered with a tent of light-blocking fabric over a PVC frame. Aquarium lights (maximum PAR  
419 of  $300 \mu\text{mol photons m}^{-2} \text{s}^{-1}$ ) on a digital timer were attached to the inside of the PVC frame,  
420 allowing for simulation of a controlled diurnal cycle that mimicked the sunrise and set times for  
421 the area.

422 Incubations of aquarium-cultured coral were carried out over February-March, 2018  
423 using exclusively MANTA sensors in 1 l polycarbonate incubation tubes. This was done so that  
424 the entire tube and attached sensor could be placed horizontally and submerged underwater.  
425 Fragments of the hard coral of *Montipora capricornis* were incubated either in the dark as  
426 described for the incubations in Curaçao, or in the aquarium where they were originally growing  
427 such that they maintained the same temperature and light cycle.

428 All incubation DO time series data were analyzed using the aforementioned  
429 computational algorithm to identify any DO spikes. Additionally, for any open-top incubations,  
430 Fick's first law of diffusion was used to calculate the amount of oxygen potentially introduced  
431 via diffusion across the air-water interface (Wanninkhof et al., 2009) and that amount was  
432 subtracted from the DO measurements. See Supplemental Methods for a detailed description of  
433 these calculations.

434

## 435 **Results**

### 436 **Review of Literature**

437 An extensive literature search identified 28 (20 temperate, 8 tropical) studies that have  
438 published figures of DO time series spanning 24 hours or more between 1970 and 2015.  
439 Including an additional 13 datasets collected during this study, 78% (32 out of 41) document an  
440 increase and subsequent decrease in DO concentration during the night lasting between 4 and 8  
441 hours, with 63% (20 out of 32) of those studies originating in the tropics (Figure 1, Table S1).  
442 Quantitative comparisons across these datasets are difficult due to differences in methodologies  
443 and reported DO units (e.g., oxygen flux rates, isotopic ratios, percent air saturation,  $\text{mmol m}^{-2} \text{d}^{-1}$ ),  
444 and calculating DO values for each using a consistent metric would require access to  
445 numerous unpublished datasets. However, qualitative details can be observed in the published  
446 figures and data. Two studies on the Island of Mo'orea (Sournia, 1976; Campion-Alsumard et  
447 al., 1993) (Figure 1, inset numbers 29-30) identified a nighttime DO spike, but did not discuss it.  
448 Hydrodynamics were suggested to underlie nighttime variability in DO off the coast of Japan,  
449 bringing more oxygenated offshore water onto the reef (Kayanne et al., 2008) (Figure 1, number  
450 12 inset). Evidence in support of this hypothesis includes shifts in pH, temperature, and tides that  
451 occurred simultaneously with the DO spike, indicative of changing hydrodynamic conditions at  
452 the study location.

453 Methods can indicate whether the DO increase results from physical or biological  
454 processes. Because argon's dissolution properties in seawater are very similar to those of  
455 oxygen, changes in oxygen:argon ratios ( $\delta\text{O}_2:\text{Ar}$ ) can be used to distinguish between biologically  
456 produced oxygen increases and atmospheric dissolution of oxygen. Luz and Barkan (2009) used  
457 this method to calculate net oxygen production in the Red Sea (Figure 1, number 7 inset) and  
458 showed a spike in  $\delta\text{O}_2:\text{Ar}$  between 01:00 a.m. and 05:00 a.m., which supports biologically  
459 derived net oxygen production at night. The authors do not discuss this observation or any  
460 implications related to it, however. These studies illustrate that the origin of DO spikes can be  
461 attributed to both biological and physical processes, but also that they are often ignored.  
462 Nevertheless, the observation of a spike in DO at night in numerous published datasets appears  
463 to be a common phenomenon across the tropics, though the underlying mechanisms have never  
464 been specifically investigated.

### 465 **Repeatability of Nighttime Oxygen Production *In Situ***

466 We identified nighttime DO spikes in all our datasets with varying degrees of frequency,  
467 height, duration, and time of occurrence (Table S3 & S4). The percentage of nights with a DO  
468 spike compared to all nights observed is 81% (231 out of 284, Table S3), just above the 78%  
469 observed in the literature. However, the proportion of nights during which DO spikes were

470 observed differed among locations: Curacao – 67% (4 out of 6); Palmyra BEAMS – 71% (44  
471 out of 62); Mo’orea – 76% (41 out of 54); Line Islands cBITs – 88% (142 out of 162).

472 The highest DO spike across all our datasets was measured at  $35.1 \mu\text{mol kg}^{-1}$  on the  
473 island of Mo’orea (Table S4, Figure S5B – orange asterisk). DO spikes on Mo’orea’s reefs were  
474 on average the highest and longest lasting of any dataset, but also the most variable (mean  $\pm$  SD  
475 of  $8.6 \pm 7.4 \mu\text{mol kg}^{-1}$  and  $3.0 \pm 1.3$  h). Height for DO spikes in the remaining datasets ranged  
476 from a mean ( $\pm$  SD) of  $1.5 \pm 1.0$  to  $7.3 \pm 7.1 \mu\text{mol kg}^{-1}$ , and the mean spike width for all sites  
477 was around  $2.6 \pm 1.2$  h. The widest DO spike occurred on Vostok island in the Southern Line  
478 Islands chain (8.0 h on Oct. 24, 2013 02:30). The smallest spikes in terms of both height and  
479 width were observed on the island of Curacao (mean  $\pm$  SD of  $1.5 \pm 1.0 \mu\text{mol kg}^{-1}$  and  $1.9 \pm 0.4$   
480 h, and Figure S5A). Median values for both height and width are always smaller than the mean,  
481 indicating the data skew toward smaller values for overall DO spikes. Diel fluctuations in DO  
482 concentration also varied greatly from site to site, with no obvious upper or lower threshold  
483 limiting the occurrence of a nighttime DO spike. Average DO concentration reached during the  
484 spikes varied from  $137.0 \pm 20.0 \mu\text{mol kg}^{-1}$  at Mo’orea to  $188.0 \pm 11.4 \mu\text{mol kg}^{-1}$  in the Line  
485 Islands. In sum, at every location we studied, nighttime DO spikes we documented occurring  
486 across multiple nights, with each set of DO spikes exhibiting location-specific local  
487 characteristics.

488 The Line Islands cBITs and Palmyra BEAMS datasets combined represent 79% of all  
489 observations across all datasets (224 out of 284, Table S3), with 83% of those being positive  
490 identifications of a DO spike (186 out of 224). Taken in conjunction with the fact that these two  
491 datasets contain the most shared variables across all of the datasets (Table S2), the subsequent  
492 analyses focus exclusively on these data. The number of nights with and without DO spikes  
493 shows a latitudinal trend where most of the nights without DO spikes occur nearer the equator  
494 for the Line Islands cBITs (Fanning to Millennium, Figure 2A). Most spike heights are between  
495  $0.5$  and  $10 \mu\text{mol kg}^{-1}$  and occur more than 4 hours after sunset (Figure 2B & 2C).

## 496 Statistical Analysis of Potential Mechanisms

497 The top predictors of DO spike occurrence are a mix of biologically related variables ( $\Delta$   
498  $\Omega$  aragonite,  $\Delta$  pH, pH, and the mean DO from the previous day) and one physical parameter  
499 (temperature) (Figure 2D-2H). These variables were the best predictors when assessing the data  
500 at both the island-plus-site and site-only levels. The variation in each of these predictors between  
501 DO spike presence and absence helps describe what events are taking place when a DO spike  
502 occurs.

503 Biological variables show that  $\Delta \Omega$  aragonite and  $\Delta$  pH are both near zero to slightly  
504 positive when a spike occurs, while pH is higher (Figure 2D, 2E and 2G). This indicates  $\Omega$   
505 aragonite and pH are approaching a local maximum, which can be seen in the described behavior  
506 for DO spike presence and absence constructed using the original values plus first and second  
507 derivatives (Figure S6H and S6L). For the combined datasets pH values are higher when DO  
508 spikes occur but not  $\Omega$  aragonite (Figure 2G and S6I). However, when comparing each dataset  
509 individually, it becomes apparent that the  $\Omega$  aragonite is also higher when DO spikes occur  
510 (Figure S7A and S7D), but this pattern is lost when combining the Line Islands cBITs and  
511 Palmyra BEAMS data. Each dataset individually shows that  $\Omega$  aragonite is higher when DO  
512 spikes occur, but the Line Islands cBITs data has overall lower  $\Omega$  aragonite values than the

513 BEAMS data. The other biologically relevant parameter from the random forests analysis  
514 describes DO concentration during daylight hours, where the mean DO from the previous day is  
515 higher when a DO spike occurs (Figure 2H).

516 Two additional biological variables exclusive to the Palmyra BEAMS dataset (and thus  
517 excluded from the random forests analysis) are derived from DO and pH data: net community  
518 production (NCP) and net community calcification (NCC). Neither of these have different  
519 original values between when a DO spike occurs and when it does not (Figure S6M and S6Q),  
520 but  $\Delta$  NCC and  $\Delta\Delta$  NCP are both significantly different (Figure S6N and S6S). These describe a  
521 pattern where NCC is flat and NCP is at a local minimum when DO spikes occur, while NCC is  
522 steadily dropping and NCP is flat when DO spikes do not occur (Figure S6P and S6T).  
523 Temperature is lower when DO spikes occur (Figure 2F) and is stable, while it is higher but  
524 steadily dropping when DO spikes do not occur (Figure S7H). One island level physical variable,  
525 hydrodynamic pressure at 300 m depth was selected as a significant predictor during random  
526 forests analysis, but no significant differences were seen between DO spike presence and  
527 absence (Figure S7A – S7D).

528 Several mixed-effect linear models using the variables identified in the random forests  
529 analysis and combined to form a structural equation model (SEM) (Table S5) confirm that the  
530 strongest predictors of DO spike occurrence are pH,  $\Omega$  aragonite, and temperature (Figure 3A).  
531 The overall strongest predictor of spike occurrence is the actual DO concentration at the time of  
532 a spike (coefficient: +33.64, p-value: 0.0012, Table S6), indicating that overall nighttime DO is  
533 not so variable as to prevent spikes from consistently producing DO concentrations higher than  
534 the DO concentrations when spikes do not occur. The second strongest overall predictor of DO  
535 spikes is  $\Delta\Delta$  pH (coefficient of -33.28, p-value: 0.0032), confirming that pH does indeed reach a  
536 local maximum and not a minimum alongside DO. The first derivative of DO directly correlates  
537 with DO spikes, so this relationship is heavily penalized by the correlation structure in the model  
538 and does not show up in the SEM plot. However, predictors of  $\Delta$  DO can generally be assumed  
539 as predictors of DO spike occurrence since the model for each of these variables is effectively  
540 predicting the same event using either regression or binary classification, respectively (Table  
541 S5). Temperature is a strong predictor of  $\Delta$  DO (coefficient: -22.67, p-value: 0.001), which  
542 matches the finding that temperature is lower when DO spikes occur. The nature of the  
543 relationships between pH,  $\Omega$  aragonite and DO spikes are also validated by the SEM analysis,  
544 where  $\Delta$  pH and  $\Delta$   $\Omega$  aragonite are positive predictors of DO spikes and  $\Delta$  DO, indicating that  
545 they each reach local maxima together.

546 Another set of nested linear models using only data where DO spikes are present (Table  
547 S7) shows that in addition to pH and  $\Omega$  aragonite, the levels of DO and PAR present the day  
548 before a DO spike occurs can predict the height of the spike (Figure 3B). The strongest predictor  
549 of either height or time is pH, which is a very strong predictor of DO spike time (coefficient: -  
550 124.84, p-value: 0.006, Table S8). The strongest predictor of height is  $\Delta$  pH (coefficient: -15.39,  
551 p-value: 0.0001). Mean DO concentration the day before a DO spike occurs is the second  
552 strongest predictor of spike height (coefficient: +13.33, p-value: 0.023). This also confirms the  
553 random forests prediction of higher mean DO the day before a DO spike occurs. Overall these  
554 data reinforce the significance of the positive relationship between pH and nighttime DO spikes.

555 Robust regressions (regressions that iteratively weight the median data values higher than  
556 the upper and lower extrema) between selected variables of interest from analyses up to this

557 point elucidate a more nuanced relationship between nighttime DO spikes and pH related  
558 parameters (Figure 4). The sums of nightly NCC and NCP ( $\Sigma$ NCC and  $\Sigma$ NCP) for both sites in  
559 the Palmyra BEAMS dataset show different relationships to DO spike height between the two  
560 sites (Figure 4A & 4B).  $\Sigma$ NCC becomes more positive, indicating more net accretion of calcium  
561 carbonate/calcalcification as DO spike height increases at the calcifier-dominated site (purple solid  
562 line - Figure 4A).  $\Sigma$ NCP on the other hand, becomes more negative indicating increased  
563 respiration (purple solid line - Figure 4B). On the non-calcifier dominated site relationships  
564 between  $\Sigma$ NCC or  $\Sigma$ NCP were not observed (green dotted line - Figure 4A and 4B). DO and  $\Omega$   
565 aragonite at the time of a DO spike for these two sites also do not have a significant linear  
566 relationship to spike height, showing that the instantaneous values for these two parameters are  
567 not drivers of height in this dataset (Figure 4C & 4D). However, significantly positive  
568 relationships between DO and  $\Omega$  aragonite to spike height are present in the combined Line  
569 Islands cBITs and BEAMS datasets (Figure S11). Additionally, positive coupling exists between  
570 temperature and spike height, and temperature and pH, while there is a negative association  
571 between pH and the time an DO spike occurs (Figure S12A - S12C). This demonstrates that  
572 increasing temperature leads to larger DO spikes, while spikes happen later when pH is lower.  
573 The mean DO concentration the day before a DO spike was not found to significantly increase or  
574 decrease in relation to spike height (Figure S12D), casting doubt on the predictive strength of  
575 this relationship.

576 One physical variable, hydrodynamic pressure at 300 m depth had a significant  
577 correlation with DO spike height, while site level physical variables (observed in the Palmyra  
578 BEAMS data) show no linear relationship to height (Figure S13). However, there are significant  
579 differences between when a DO spike occurs and when it does not for the site level variables  
580 (Figure S8I - S8T). The combination of these findings indicates that locally pressure is higher  
581 when DO spikes occur and increases offshore as spike height increases, which describes a  
582 relatively calmer hydrodynamic environment. The observation of a higher percentage of  
583 nighttime DO spikes in the semi-enclosed cBITs also supports a positive relationship between  
584 these spikes and comparatively slower water movement. However, local current speed and  
585 directional shifts from the BEAMS dataset are associated with times when DO spikes occur,  
586 which in total describes a situation of calmer hydrodynamic conditions becoming less so.

587 Up to this point, all analyses presented here have been carried out on data representing  
588 only the exact time of a nighttime DO spike, excluding the extensive information contained in  
589 the rest of the time series data. Four separate generalized additive models (GAMs) built using  
590 site level physical variables, island level physical variables, biologically mediated variables, or a  
591 combination of all variables for the entire Palmyra BEAMS dataset show that NCC, NCP and  $\Omega$   
592 aragonite plus local current data are best at predicting if a DO spike will occur (Figure S14). The  
593 GAMs were most accurate when only nighttime data and only data collected closest to the  
594 benthos (for vertical gradient variables, see Methods) were used. However, this presented a  
595 problem when testing the models since subsetting training and testing data using very few DO  
596 spike observations was difficult. The GAMs fitted back to the original data do show that the  
597 combined GAM explains 81% of the variance in the data, which is an objectively good fit  
598 (Figure S14A). This validates the findings from all other analyses that drivers of nighttime DO  
599 spikes are predominantly related to NCC and NCP, with additional influence from water  
600 currents.

## 601 *In Vitro* Isolation of Nighttime DO Spikes

602 A multitude of different incubation experiments were performed under controlled light  
603 and temperature conditions to determine if nighttime DO spikes could be isolated from open  
604 ocean influences (Figure 5, Tables S9 – S11). In total, 68 separate incubations were carried out,  
605 with 125 observations among them due to some incubations lasting several diurnal light cycles  
606 (Table S9 and S11). Of those observations, nighttime DO spikes occurred 23% of the time (29  
607 out of 125). Crustose coralline algae (CCA, wild collected, Figure 5H and 5I) incubations  
608 produced DO spikes at a rate of 37% (16 out of 27), and coral (aquarium cultured *Montipora*  
609 *capricornis*, Figure 5G & 5J) incubations at a rate of 32% (12 out of 25). DO spikes did not  
610 occur with incubations of other benthic organisms/samples after correcting for diffusion across  
611 the air-water interface in all non-sealed incubations (Figure 6A, Table S10). DO spikes occurred  
612 most frequently between 12 hours and 2 days of incubation time and were generally between 1.0  
613 and 3.0  $\mu\text{mol kg}^{-1}$  in height, with a few exceeding 30.0  $\mu\text{mol kg}^{-1}$  (Figure 6B and 6C).

614 The sum of oxygen present per 12-hour period can reasonably be assumed to represent  
615  $\Sigma\text{NCP}$  per night in these incubations as any non-biological oxygen inputs have either been  
616 eliminated (by fully sealing the incubation chamber in an air-tight manner) or accounted for (by  
617 subtracting the amount of DO due to passive diffusion for open incubations). The  $\Sigma\text{NCP}$  is  
618 significantly lower when DO spikes occur in incubations and decreases as spike height increases  
619 (Figure 6D and 6E). These findings show that DO spikes can occur when fully isolated from  
620 non-biological variables and spike height increases with increasing respiration, as seen with the  
621 Palmyra BEAMS calcifier-dominated site. The observation of nighttime DO spikes in  
622 incubations of CCA and coral, but no other benthic organisms also supports the relationships  
623 between NCC, NCP and DO spike height observed at the calcifier-dominated site.

## 624 Discussion

625 Here we provide unequivocal evidence that nighttime DO spikes occur regularly on the  
626 coral reef benthos around the world. We used a combination of peer reviewed, published data  
627 from 1970-present, our own field-based data collected from two ocean basins and data collected  
628 in controlled laboratory settings to corroborate these findings. In addition to documenting the  
629 existence of nighttime oxygen spikes in the environment, we sought to identify potential causal  
630 mechanisms. After extensive analyses of a variety of physical, environmental and oceanographic  
631 predictor variables, we were able to identify pH and  $\Omega$  aragonite as the strongest predictors of  
632 DO spike occurrence and describe a positive correlation between calcification ( $\Sigma\text{NCC}$  per night)  
633 and DO spike height alongside a negative correlation between productivity ( $\Sigma\text{NCP}$  per night) and  
634 spike height. Further, detailed laboratory studies under controlled conditions allowed our team to  
635 isolate the pattern in a closed system, suggesting that DO spikes are likely the results of a  
636 biological, rather than a physical, process.

637 While it is obvious that physical forces influence DO concentrations during the night on  
638 reefs, the data presented here do not suggest that abiotic mechanisms are exclusively responsible  
639 for the existence of nighttime DO spikes. Abiotically, DO does not directly influence pH because  
640 it does not react with water to form  $\text{H}^+$ . While DO is correlated with pH in marine systems due to  
641 biological influences (e.g., photosynthesis and respiration), physical processes transport water  
642 that shows the same correlation for the same reasons. This may partially explain pH and  $\Omega$   
643 aragonite as drivers for DO spikes, however the SEM approach used in this study is specifically

644 designed to describe directional, causal relationships (Shiple, 2009, 2013). No significant  
645 relationship where DO causes pH changes was found, whereas pH was strongly predicted to  
646 cause all aspects of DO spikes.  $\Delta$  pH slightly decreases from zero as DO spike height increases  
647 (Figure S11B) in a relationship shown to be a strong predictor of height (Figure 3B). This  
648 indicates that as DO spikes get larger pH reaches a local maximum just before DO does, which  
649 does not support a situation where DO and pH always change simultaneously. DO spikes causing  
650 pH spikes also does not explain nightly  $\Sigma$ NCC increasing as the height of DO spikes increases at  
651 a site dominated by calcifying organisms, since  $\Omega$  aragonite (and thus pH) were shown to be  
652 decoupled from increasing spike height at this site (Figure 4). Takeshita et al. (2016) also found  
653 that daily  $\Sigma$ NCC was decoupled from daily mean  $\Omega$  aragonite for both Palmyra BEAMS sites.  
654 Therefore, it is likely a more complex relationship is present during nighttime DO spikes then  
655 simply an external input of oxygen increasing pH and  $\Omega$  aragonite and that subsequently  
656 increases NCC.

657 In order for oxygen to increase there must be either autochthonous oxygen (e.g.  
658 biological release *in situ*) or allochthonous oxygen inputs (e.g. transport by physical processes  
659 such as tides, currents or wind-driven waves), both of which have been addressed in this study.  
660 Our observation of increased DO during fully sealed incubation chambers provides evidence that  
661 these benthic organisms are capable of producing DO during the night. Physical contributions in  
662 these experiments from convection due to a temperature gradient (coupled to an oxygen  
663 gradient) in the vertical incubation chambers can be ruled out by the observations of some of the  
664 largest DO spikes in horizontally oriented, fully sealed chambers (Table S10). Further evidence  
665 in support of this can be seen in two of the highest DO spikes from incubations, each above 30  
666  $\mu\text{mol kg}^{-1}$  (Figure S16). These two incubations represent two different organisms (CCA and  
667 coral) in two different incubation setups (an open vertical chamber and a fully sealed horizontal  
668 chamber) (Figure S16A and S16B, respectively). The chamber incubated horizontally with the  
669 sensor positioned in the side and at the same level as the coral sample (also closer to, since the  
670 coral was positioned in the middle of the chamber) shows more evidence of DO spike correlation  
671 with temperature fluctuations than the vertical chamber. This is likely caused by on and off  
672 cycles of the climate control system in the room where the incubation was carried out as well as  
673 increasing metabolic activity with temperature, rather than convective or diffusive gradient  
674 shifts.

675 DO spike height increases as  $\Sigma$ NCP decreases at a reef site dominated by calcifiers and in  
676 incubations, lending support to these spikes being positively correlated with increased  
677 respiration. DO spikes also generally occur either during or just after a period of calm  
678 hydrodynamic conditions yet changes in those same conditions are not associated with DO spike  
679 height. Temperature does increase with spike height although it is generally lower overall than  
680 when no spikes are observed. While at least one *in situ* study suggests that decreasing water flow  
681 leads to overall decreased respiration and calcification at night (Shaw et al., 2014), this is  
682 attributed to less available oxygen and DIC leading to less consumption of both. In the case of  
683 nighttime DO spikes, conditions appear to converge on a combination of increased consumption  
684 but less water movement. These observations suggest that DO spikes result from a punctuated  
685 uptick in metabolic activity under conditions that are not conducive to supporting such activity.

## 686 Potential Biological Explanations



687 Based on these findings, we hypothesize that some of the nighttime DO spikes are a  
688 biological response by benthic calcifying organisms to increasing respiration combined with  
689 reduced exposure to more oxygenated water. This results in intracellular hypoxia and significant  
690 H<sub>2</sub>O<sub>2</sub> release, which is subsequently degraded into DO and H<sub>2</sub>O via ROS detoxification activities  
691 of pelagic and benthic organisms. Hypoxia response in eukaryotes is highly conserved and  
692 involves H<sub>2</sub>O<sub>2</sub> production from superoxide via the electron transport chain (ETC) (Guzy &  
693 Schumacker, 2006). Oxygen sensing molecules in mitochondria switch the ETC into superoxide  
694 production mode when intracellular oxygen reaches a critical threshold but is not exhausted  
695 (Murphy, 2009; Cadenas, 2018). In this manner some oxygen is used to create the powerful  
696 signaling molecule H<sub>2</sub>O<sub>2</sub>, which then turns on hypoxia inducible factors (HIFs) that activate a  
697 metabolic shift leading to reduced oxygen consumption (Semenza, 2007; Smith, Waypa &  
698 Schumacker, 2017). Coral HIFs have recently been described and coral have been shown to  
699 survive low oxygen levels around 1 mg l<sup>-1</sup> (equivalent to 31.3 μmol kg<sup>-1</sup>) for up to 72 hours  
700 (Vaquer-Sunyer & Duarte, 2008; Zoccola et al., 2017), implying some degree of conserved,  
701 long-term hypoxia response. As discussed in the introduction, coral have also previously been  
702 shown to rapidly release H<sub>2</sub>O<sub>2</sub> in concentrations that could result in its breakdown to form DO  
703 spikes of the size shown here. Crustose coralline algae also produce H<sub>2</sub>O<sub>2</sub> in response to hypoxic  
704 stress which is often detoxified by bromoperoxidase, a potent generator of singlet oxygen  
705 (another type of ROS) that rapidly decays to ground-state molecular oxygen (Everett, Kanofsky  
706 & Butler, 1990; Triantaphylidès & Havaux, 2009; Wever, Krenn & Renirie, 2018). A large H<sub>2</sub>O<sub>2</sub>  
707 release as respiration drives oxygen concentrations inside the cells of coral or CCA below the  
708 signaling threshold for hypoxia is the most parsimonious biological explanation for the nighttime  
709 DO spikes presented in this study at this time.

710 Increased calcification could also be a response to hypoxia, as suggested by Wooldridge  
711 (2013) with reference to a theoretical coral glyoxylate pathway (Kondrashov et al., 2006) that  
712 would help coral cells detoxify increasing concentrations of acetate, built up through prolonged  
713 fermentative metabolism (Müller et al., 2012). Wooldridge hypothesizes that acetate once  
714 converted to oxalate is pumped into the coral's extra-cytoplasmic calcifying fluid where it  
715 complexes with calcium ions to form calcium oxalate crystals. These crystals in turn become  
716 nucleation sites for nighttime calcium carbonate precipitation. While experimentally unverified  
717 as a complete process, several other studies have remarked on patterns of dark calcification and  
718 respiration similar to those in our study and speculated that a link between increased calcification  
719 and environmental stress may be at work (Domart-Coulon et al., 2014; Jokiel, Jury & Rodgers,  
720 2014; Rippe et al., 2018). Calcifying red and green algae (e.g., CCA) are also known to use the  
721 glyoxylate pathway in a comparable manner to precipitate their calcified structures (Pueschel &  
722 West, 2007; Yang et al., 2015).

## 723 Relevance to Coral Health

724 Nighttime DO spikes, given our hypothesis is further verified, are likely part of a  
725 hyperbolic response to hypoxia wherein the DO spikes occur at an early to intermediate stage of  
726 hypoxic stress and then give way to more drastic reductions in metabolic activity, similar to the  
727 general response curves described by Nelson and Altieri (2019). Increased respiration in at least  
728 one species of coral an hour after exposure to hypoxia has been reported, followed by respiration  
729 decrease after longer exposure (Dodds et al., 2007). Many studies of the effects of hypoxia on  
730 corals have used environmental conditions at less than 50% air saturation, more in line with the

731 conditions in our incubations where DO often dropped well below 50% saturation, but with  
732 much greater water flow and only the differences in respiration or calcification from beginning to  
733 end points are reported (Al-Horani, Tambutté & Allemand, 2007; Wijgerde et al., 2014; Osinga  
734 et al., 2017). We see DO spikes *in situ* at DO concentrations that are never below 70%  
735 saturation, meaning that these DO spikes are perhaps one of the first environmental signs of  
736 intracellular hypoxia. Hypoxic stress is quickly gaining attention as an ongoing threat to coral  
737 reef health due to rising temperatures, eutrophication and competition with fleshy macroalgae  
738 (Barott et al., 2009; Haas et al., 2013b,a; Sugden, 2017; Roach et al., 2017; Gajdzik & DeCarlo,  
739 2017; Breitbart et al., 2018; Nelson & Altieri, 2019). H<sub>2</sub>O<sub>2</sub> in excess has also been linked to  
740 coral bleaching (Downs et al., 2002). If regular observations of DO spikes are an indicator of  
741 repeated but moderate hypoxic stress, they would be a sort of bellwether for greater  
742 susceptibility to coral bleaching events, disease and even mass mortality. It would be important  
743 to include them in future reef health assessment systems for this reason.

## 744 Limitations of Statistical Inference

745 The goodness of fit data for the SEM analyses indicate that time was not well modeled at  
746 an r-squared value of 0.34 even after accounting for island as a random variable (Figure S10B).  
747 This is the lowest r-squared for any model in either SEM analysis and implies that additional  
748 data/modeling approaches may be needed to improve the fit. However, the p-value of 0.409 for  
749 the height-time SEM (Table S7) leads to rejection of the null hypothesis that there are significant  
750 relationships in the data not represented in the model. Thus, of all the relationships represented in  
751 the SEMs, relationships with time are the most questionable. The remaining relationships are  
752 well fit and trustworthy, even with a p-value of 0.004 for the DO spike occurrence SEM (Table  
753 S5). This is due to three significant relationships not included in the model because they do not  
754 make sense from a causal standpoint (spike occurrence as a predictor for  $\Delta$  DO, and two aspects  
755 of DO as predictors of temperature). Likewise, the GAM analysis was incomplete due to limited  
756 observations of DO spikes in the Palmyra BEAMS data that made testing the model difficult.  
757 Yet, the combined model fits the data well allowing for some degree of trustworthiness to exist.  
758 Additional time series data of the type in this dataset should be used in future modeling efforts to  
759 strengthen the causal inferences.

760 There are more total observations for CCA and coral samples in the incubation data than  
761 any other organism or sample type. With a DO spike occurrence rate of only 23% it is tempting  
762 to assume that there were not enough incubations of other types for spikes to be observed.  
763 However, the first set of incubations done in 2015 included all wild collected benthic  
764 organism/sample types in equivalent numbers of incubations (see Methods). Once the largest DO  
765 spikes were observed in CCA samples and DO spikes in other samples were eliminated after  
766 correcting for diffusion in the open incubation chambers, subsequent incubations focused on  
767 CCA and later coral.

## 768 Conclusion

769 This study clearly identifies the existence and prevalence of nighttime DO spikes from  
770 coral reefs around the world. Further, these data provide evidence that nighttime DO spikes are  
771 at least partially biological in origin and that this process has a significant effect on coral reef  
772 productivity, a finding that demands more research. Future studies should focus on further  
773 analyses of both *in situ* and *in vitro* data, especially mechanistic studies that reveal the source of

774 these anomalies. Rigorous models based on statistical learning methods can be developed from  
775 additional time series data and at specific points when spikes occur to further evaluate the  
776 mechanism driving DO increases at night. Incubation studies utilizing sensors for H<sub>2</sub>O<sub>2</sub> as well  
777 as pH and discrete TA and DIC measurements will help further understanding of the calcification  
778 and hypoxia link, as well as provide more data for a biological model of what might be  
779 occurring. These findings have important implications for biological feedbacks, benthic  
780 boundary layer dynamics, hypoxia, reef metabolism and overall coral reef health and resilience.  
781 We hope that these results motivate future research to help resolve this widespread and  
782 ecologically important phenomenon.

783

## 784 **Acknowledgements**

785 The authors would like to thank Dr. Barbara Bailey, professor of statistics at San Diego  
786 State University (SDSU) and members of the Biomath Group at SDSU for their guidance  
787 regarding appropriate statistical models for this work. We also thank Mark Hatay of SDSU for  
788 his assistance constructing custom incubation chambers, as well as staff and researchers  
789 affiliated with the CARMABI research station, the crew of the Hanse Explorer, the Nature  
790 Conservancy and the Palmyra Atoll Research Consortium.

791

## **References**

- Al-Horani FA, Tambutté É, Allemand D. 2007. Dark calcification and the daily rhythm of calcification in the scleractinian coral, *Galaxea fascicularis*. *Coral Reefs* 26:531–538. DOI: 10.1007/s00338-007-0250-x.
- Archer E. 2019. Estimate Permutation p-Values for Random Forest Importance Metrics. Available at <https://github.com/EricArcher/rfPermute> (accessed April 22, 2019).
- Armoza-Zvuloni R, Schneider A, Sher D, Shaked Y. 2016. Rapid Hydrogen Peroxide release from the coral *Stylophora pistillata* during feeding and in response to chemical and physical stimuli. *Scientific Reports* 6:21000. DOI: 10.1038/srep21000.
- Averina S, Velichko N, Senatskaya E, Pinevich A. 2018. Far-red light photoadaptations in aquatic cyanobacteria. *Hydrobiologia* 813:1–17. DOI: 10.1007/s10750-018-3519-x.
- Barott K, Smith J, Dinsdale E, Hatay M, Sandin S, Rohwer F. 2009. Hyperspectral and Physiological Analyses of Coral-Algal Interactions. *PLoS ONE* 4:e8043. DOI: 10.1371/journal.pone.0008043.
- Breitburg D, Levin LA, Oschlies A, Grégoire M, Chavez FP, Conley DJ, Garçon V, Gilbert D, Gutiérrez D, Isensee K, Jacinto GS, Limburg KE, Montes I, Naqvi SWA, Pitcher GC, Rabalais NN, Roman MR, Rose KA, Seibel BA, Telszewski M, Yasuhara M, Zhang J. 2018. Declining oxygen in the global ocean and coastal waters. *Science (New York, N.Y.)* 359:eaam7240. DOI: 10.1126/science.aam7240.
- Cadenas S. 2018. ROS and redox signaling in myocardial ischemia-reperfusion injury and cardioprotection. *Free Radical Biology and Medicine* 117:76–89. DOI: 10.1016/J.FREERADBIOMED.2018.01.024.
- Campion-Alsumard T, Romano JC, Peyrot-Clausade M, Campion J, Paul R. 1993. Influence of

- some coral reef communities on the calcium carbonate budget of Tiahura reef (Moorea, French Polynesia). *Marine Biology* 115:685–693. DOI: 10.1007/bf00349377.
- Canfield DE. 2013. *Science Essentials*: Oxygen: A Four Billion Year History. Princeton, NJ, USA: Princeton University Press.
- Daggers TD, Kromkamp JC, Herman PMJ, van der Wal D. 2018. A model to assess microphytobenthic primary production in tidal systems using satellite remote sensing. *Remote Sensing of Environment* 211:129–145. DOI: 10.1016/J.RSE.2018.03.037.
- Dickson AG (Andrew G, Sabine CL, Christian JR, North Pacific Marine Science Organization. 2007. *Guide to best practices for ocean CO<sub>2</sub> measurements*. North Pacific Marine Science Organization.
- Dodds LA, Roberts JM, Taylor AC, Marubini F. 2007. Metabolic tolerance of the cold-water coral *Lophelia pertusa* (Scleractinia) to temperature and dissolved oxygen change. *Journal of Experimental Marine Biology and Ecology* 349:205–214. DOI: 10.1016/J.JEMBE.2007.05.013.
- Domart-Coulon I, Stolarski J, Brahmi C, Gutner-Hoch E, Janiszewska K, Shemesh A, Meibom A. 2014. Simultaneous extension of both basic microstructural components in scleractinian coral skeleton during night and daytime, visualized by in situ <sup>86</sup>Sr pulse labeling. *Journal of Structural Biology* 185:79–88. DOI: 10.1016/J.JSB.2013.10.012.
- Downs C., Fauth JE, Halas JC, Dustan P, Bemiss J, Woodley CM. 2002. Oxidative stress and seasonal coral bleaching. *Free Radical Biology and Medicine* 33:533–543. DOI: 10.1016/S0891-5849(02)00907-3.
- Ettwig KF, Butler MK, Le Paslier D, Pelletier E, Mangenot S, Kuypers MMM, Schreiber F, Dutilh BE, Zedelius J, de Beer D, Gloerich J, Wessels HJCT, van Alen T, Luesken F, Wu ML, van de Pas-Schoonen KT, Op den Camp HJM, Janssen-Megens EM, Francoijs K-J, Stunnenberg H, Weissenbach J, Jetten MSM, Strous M. 2010. Nitrite-driven anaerobic methane oxidation by oxygenic bacteria. *Nature* 464:543–548. DOI: 10.1038/nature08883.
- Ettwig KF, Speth DR, Reimann J, Wu ML, Jetten MSM, Keltjens JT. 2012. Bacterial oxygen production in the dark. *Frontiers in Microbiology* 3:1–8. DOI: 10.3389/fmicb.2012.00273.
- Everett RR, Kanofsky JR, Butler A. 1990. Mechanistic investigations of the novel non-heme vanadium bromoperoxidases. Evidence for singlet oxygen production. *The Journal of biological chemistry* 265:4908–14.
- Falter JL, Lowe RJ, Atkinson MJ, Monismith SG, Schar DW. 2008. Continuous measurements of net production over a shallow reef community using a modified Eulerian approach. *Journal of Geophysical Research* 113:C07035. DOI: 10.1029/2007JC004663.
- Fischer JP, Koop-Jakobsen K. 2012. The multi fiber optode (MuFO): A novel system for simultaneous analysis of multiple fiber optic oxygen sensors. *Sensors and Actuators B: Chemical* 168:354–359. DOI: 10.1016/j.snb.2012.04.034.
- Gajdzik L, DeCarlo T. 2017. The perfect calm: Reoccurring mass die-offs on a remote coral

- atoll. *Matters* 3:e201707000003. DOI: 10.19185/matters.201707000003.
- Gan F, Bryant DA. 2015. Adaptive and acclimative responses of cyanobacteria to far-red light. *Environmental microbiology*. DOI: 10.1111/1462-2920.12992.
- Gan F, Zhang S, Rockwell NC, Martin SS, Lagarias JC, Bryant DA. 2014. Extensive remodeling of a cyanobacterial photosynthetic apparatus in far-red light. *Science (New York, N.Y.)* 345:1312–7. DOI: 10.1126/science.1256963.
- Del Giorgio P, Williams P. 2007. *Respiration in Aquatic Ecosystems*. DOI: 10.1093/acprof:oso/9780198527084.001.0001.
- Guzy RD, Schumacker PT. 2006. Oxygen sensing by mitochondria at complex III: the paradox of increased reactive oxygen species during hypoxia. *Experimental Physiology* 91:807–819. DOI: 10.1113/expphysiol.2006.033506.
- Haas AF, Gregg AK, Smith JE, Abieri ML, Hatay M, Rohwer F. 2013a. Visualization of oxygen distribution patterns caused by coral and algae. *PeerJ* 1:e106. DOI: 10.7717/peerj.106.
- Haas AF, Nelson CE, Rohwer F, Wegley-Kelly L, Quistad SD, Carlson C a, Leichter JJ, Hatay M, Smith JE. 2013b. Influence of coral and algal exudates on microbially mediated reef metabolism. *PeerJ* 1:e108. DOI: 10.7717/peerj.108.
- Jokiel PL, Jury CP, Rodgers KS. 2014. Coral-algae metabolism and diurnal changes in the CO<sub>2</sub> - carbonate system of bulk sea water. *PeerJ* 2:e378. DOI: 10.7717/peerj.378.
- Kayanne H, Kudo S, Hata H, Yamano H, Nozaki K, Kato K, Negishi A, Saito H, Akimoto F, Kimoto H. 2008. Integrated monitoring system for coral reef water pCO<sub>2</sub>, carbonate system and physical parameters. *Proc. Ninth Int. Coral Reef Symp., Bali* 2:1079–1084.
- Kinsey D (DW). 1985. Metabolism, calcification and carbon production. I. System level studies. *The Fifth International Coral Reef Congress* 4:505–526.
- Kondrashov FA, Koonin E V, Morgunov IG, Finogenova T V, Kondrashova MN. 2006. Evolution of glyoxylate cycle enzymes in Metazoa: evidence of multiple horizontal transfer events and pseudogene formation. *Biology Direct* 1:31. DOI: 10.1186/1745-6150-1-31.
- Kraines S, Suzuki Y, Yamada K, Komiyama H. 1996. Separating Biological and Physical Changes in Dissolved Oxygen Concentration in a Coral Reef. *Limnology and Oceanography* 41:1790–1799. DOI: 10.4319/lo.1996.41.8.1790.
- Kraines S, Yanagi T, Isobe M, Komiyama H. 1998. Wind-wave driven circulation on the coral reef at Bora Bay, Miyako Island. *Coral Reefs* 17:133–143. DOI: 10.1007/s003380050107.
- Krumme U, Herbeck LS, Wang T. 2012. Tide- and rainfall-induced variations of physical and chemical parameters in a mangrove-depleted estuary of East Hainan (South China Sea). *Marine Environmental Research* 82:28–39. DOI: 10.1016/j.marenvres.2012.09.002.
- Lefcheck JS. 2016. piecewiseSEM: Piecewise structural equation modelling in R for ecology, evolution, and systematics. *Methods in Ecology and Evolution* 7:573–579. DOI:

10.1111/2041-210X.12512.

- Long MH, Berg P, de Beer D, Ziemann JC. 2013. In situ coral reef oxygen metabolism: an eddy correlation study. *PLoS one* 8:e58581. DOI: 10.1371/journal.pone.0058581.
- Lueker TJ, Dickson AG, Keeling CD. 2000. Ocean pCO<sub>2</sub> calculated from dissolved inorganic carbon, alkalinity, and equations for K<sub>1</sub> and K<sub>2</sub>: validation based on laboratory measurements of CO<sub>2</sub> in gas and seawater at equilibrium. *Marine Chemistry* 70:105–119. DOI: 10.1016/S0304-4203(00)00022-0.
- Luz B, Barkan E. 2009. Net and gross oxygen production from O<sub>2</sub>/Ar, 17O/16O and 18O/16O ratios. *Aquatic Microbial Ecology* 56:133–145. DOI: 10.3354/ame01296.
- Lyons TW, Reinhard CT, Planavsky NJ. 2014. The rise of oxygen in Earth's early ocean and atmosphere. *Nature* 506:307–15. DOI: 10.1038/nature13068.
- MacIntyre HL, Geider RJ, Miller DC. 1996. Microphytobenthos: The Ecological Role of the “Secret Garden” of Unvegetated, Shallow-Water Marine Habitats. I. Distribution, Abundance and Primary Production. *Estuaries* 19:186. DOI: 10.2307/1352224.
- Müller M, Mentel M, van Hellemond JJ, Henze K, Woehle C, Gould SB, Yu R-Y, van der Giezen M, Tielens AGM, Martin WF. 2012. Biochemistry and evolution of anaerobic energy metabolism in eukaryotes. *Microbiology and molecular biology reviews* □: *MMBR* 76:444–95. DOI: 10.1128/MMBR.05024-11.
- Murphy MP. 2009. How mitochondria produce reactive oxygen species. *Biochem. J* 417:1–13. DOI: 10.1042/BJ20081386.
- Nelson HR, Altieri AH. 2019. Oxygen: the universal currency on coral reefs. *Coral Reefs* 38:177–198. DOI: 10.1007/s00338-019-01765-0.
- Odum HT. 1957. Primary production measurements in eleven Florida springs and a marine turtle-grass community. *Limnology and Oceanography* 2:85–97. DOI: 10.4319/lo.1957.2.2.0085.
- Osinga R, Derksen-Hooijberg M, Wijgerde T, Verreth JAJ. 2017. Interactive effects of oxygen, carbon dioxide and flow on photosynthesis and respiration in the scleractinian coral *Galaxea fascicularis*. DOI: 10.1242/jeb.140509.
- Pueschel CM, West JA. 2007. Calcium oxalate crystals in the marine red alga *Spyridia filamentosa* (Ceramiales; Rhodophyta). *Phycologia* 46:565–571. DOI: 10.2216/06-101.1.
- Reimers CE, Özkan-Haller HT, Berg P, Devol A, McCann-Grosvenor K, Sanders RD. 2012. Benthic oxygen consumption rates during hypoxic conditions on the Oregon continental shelf: Evaluation of the eddy correlation method. *Journal of Geophysical Research* 117:C02021. DOI: 10.1029/2011JC007564.
- Rheuban JE, Berg P, McGlathery KJ. 2014. Multiple timescale processes drive ecosystem metabolism in eelgrass (*Zostera marina*) meadows. *Marine Ecology Progress Series* 507:1–13. DOI: 10.3354/meps10843.

- Rippe JP, Baumann JH, De Leener DN, Aichelman HE, Friedlander EB, Davies SW, Castillo KD. 2018. Corals sustain growth but not skeletal density across the Florida Keys Reef Tract despite ongoing warming. *Global Change Biology* 24:5205–5217. DOI: 10.1111/gcb.14422.
- Roach TNF, Abieri ML, George EE, Knowles B, Naliboff DS, Smurthwaite CA, Kelly LW, Haas AF, Rohwer FL. 2017. Microbial bioenergetics of coral-algal interactions. *PeerJ* 5:e3423. DOI: 10.7717/peerj.3423.
- Schaffner I, Hofbauer S, Krutzler M, Pirker KF, Bellei M, Stadlmayr G, Mlynek G, Djinić-Carugo K, Battistuzzi G, Furtmüller PG, Daims H, Obinger C. 2015. Dimeric chlorite dismutase from the nitrogen-fixing cyanobacterium *Cyanothece* sp. PCC7425. *Molecular microbiology* 96:1053–68. DOI: 10.1111/mmi.12989.
- Semenza GL. 2007. Life with oxygen. *Science (New York, N.Y.)* 318:62–4. DOI: 10.1126/science.1147949.
- Shaw EC, Phinn SR, Tilbrook B, Steven A. 2014. Comparability of Slack Water and Lagrangian Flow Respirometry Methods for Community Metabolic Measurements. *PLoS ONE* 9:e112161. DOI: 10.1371/journal.pone.0112161.
- Shipley B. 2009. Confirmatory path analysis in a generalized multilevel context. *Ecology* 90:363–368. DOI: 10.1890/08-1034.1.
- Shipley B. 2013. The AIC model selection method applied to path analytic models compared using a d-separation test. *Ecology* 94:560–564. DOI: 10.1890/12-0976.1.
- Smith KA, Waypa GB, Schumacker PT. 2017. Redox signaling during hypoxia in mammalian cells. *Redox Biology* 13:228–234. DOI: 10.1016/J.REDOX.2017.05.020.
- Sournia A. 1976. Oxygen metabolism of a fringing reef in French polynesia. *Helgoländer Wissenschaftliche Meeresuntersuchungen* 28:401–410. DOI: 10.1007/BF01610589.
- Sugden AM. 2017. Threats of coastal hypoxia. *Science (New York, N.Y.)* 356:38. DOI: 10.1126/science.356.6333.38-a.
- Takeshita Y, Cyronak T, Martz TR, Kindeberg T, Andersson AJ. 2018. Coral Reef Carbonate Chemistry Variability at Different Functional Scales. *Frontiers in Marine Science* 5:175. DOI: 10.3389/fmars.2018.00175.
- Takeshita Y, McGillis W, Briggs EM, Carter AL, Donham EM, Martz TR, Price NN, Smith JE. 2016. Assessment of net community production and calcification of a coral reef using a boundary layer approach. *Journal of Geophysical Research: Oceans*. DOI: 10.1002/2016JC011886.
- Tappan H. 1968. Primary production, isotopes, extinctions and the atmosphere. *Palaeogeography, Palaeoclimatology, Palaeoecology* 4:187–210. DOI: 10.1016/0031-0182(68)90047-3.
- Triantaphylidès C, Havaux M. 2009. Singlet oxygen in plants: production, detoxification and signaling. *Trends in Plant Science* 14:219–228. DOI: 10.1016/J.TPLANTS.2009.01.008.

- Vaquer-Sunyer R, Duarte CM. 2008. Thresholds of hypoxia for marine biodiversity. *Proceedings of the National Academy of Sciences of the United States of America* 105:15452–7. DOI: 10.1073/pnas.0803833105.
- Venables WN, Ripley BD. 2002. *Modern Applied Statistics with S*. New York, NY: Springer-Verlag. DOI: 10.1007/978-0-387-21706-2.
- Viaroli P, Christian RR. 2004. Description of trophic status, hyperautotrophy and dystrophy of a coastal lagoon through a potential oxygen production and consumption index—TOSI: Trophic Oxygen Status Index. *Ecological Indicators* 3:237–250. DOI: 10.1016/j.ecolind.2003.11.001.
- Wanninkhof R, Asher WE, Ho DT, Sweeney C, McGillis WR. 2009. Advances in Quantifying Air-Sea Gas Exchange and Environmental Forcing. *Annual Review of Marine Science* 1:213–244. DOI: 10.1146/annurev.marine.010908.163742.
- Wever R, Krenn BE, Renirie R. 2018. Marine Vanadium-Dependent Haloperoxidases, Their Isolation, Characterization, and Application. *Methods in Enzymology* 605:141–201. DOI: 10.1016/BS.MIE.2018.02.026.
- Wijgerde T, Silva CIF, Scherders V, van Bleijswijk J, Osinga R. 2014. Coral calcification under daily oxygen saturation and pH dynamics reveals the important role of oxygen. *Biology open* 3:489–93. DOI: 10.1242/bio.20147922.
- Wooldridge S. 2013. A new conceptual model of coral biomineralisation: hypoxia as the physiological driver of skeletal extension. *Biogeosciences* 10:2867–2884. DOI: 10.5194/bg-10-2867-2013.
- Yang W, Catalanotti C, Wittkopp TM, Posewitz MC, Grossman AR. 2015. Algae after dark: mechanisms to cope with anoxic/hypoxic conditions. *The Plant Journal* 82:481–503. DOI: 10.1111/tpj.12823.
- Zinser ER. 2018. The microbial contribution to reactive oxygen species dynamics in marine ecosystems. *Environmental Microbiology Reports*. DOI: 10.1111/1758-2229.12626.
- Zoccola D, Morain J, Pagès G, Caminiti-Segonds N, Giuliano S, Tambutté S, Allemand D. 2017. Structural and functional analysis of coral Hypoxia Inducible Factor. *PLOS ONE* 12:e0186262. DOI: 10.1371/journal.pone.0186262.



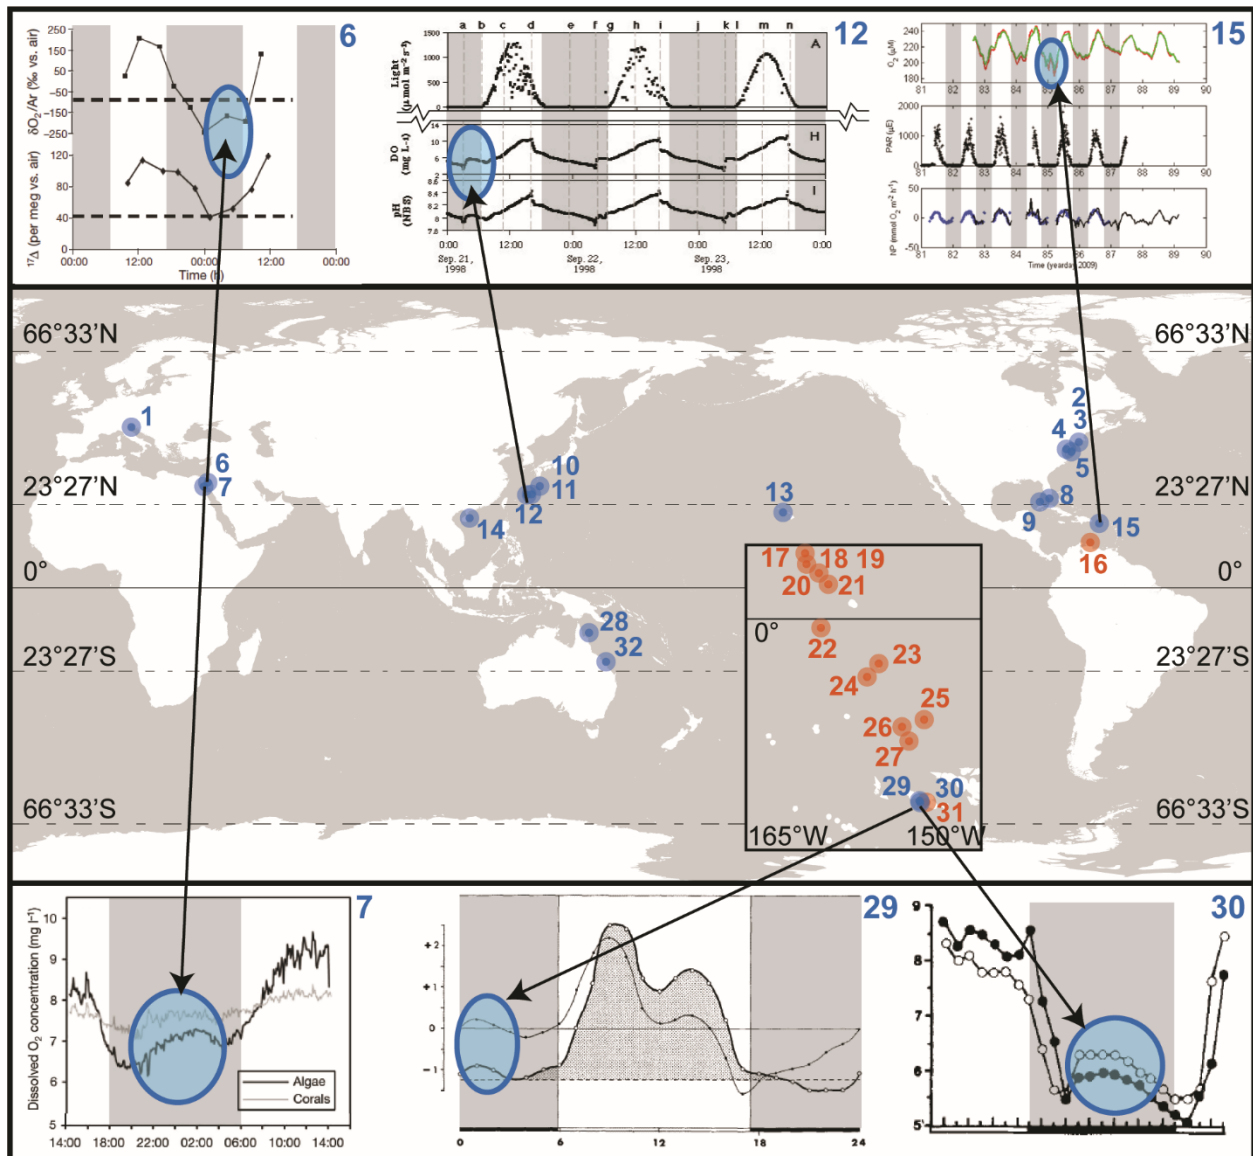

**Figure 1. Nighttime spikes in dissolved oxygen concentrations are global phenomena.**

Each number corresponds to a dataset identified during a literature search (blue dots and numbers) or a dataset presented in this study (orange dots and numbers) consisting of dissolved oxygen concentration measurements across day and night times for at least 24 hours. The equator, tropics, and polar latitudes are labeled.

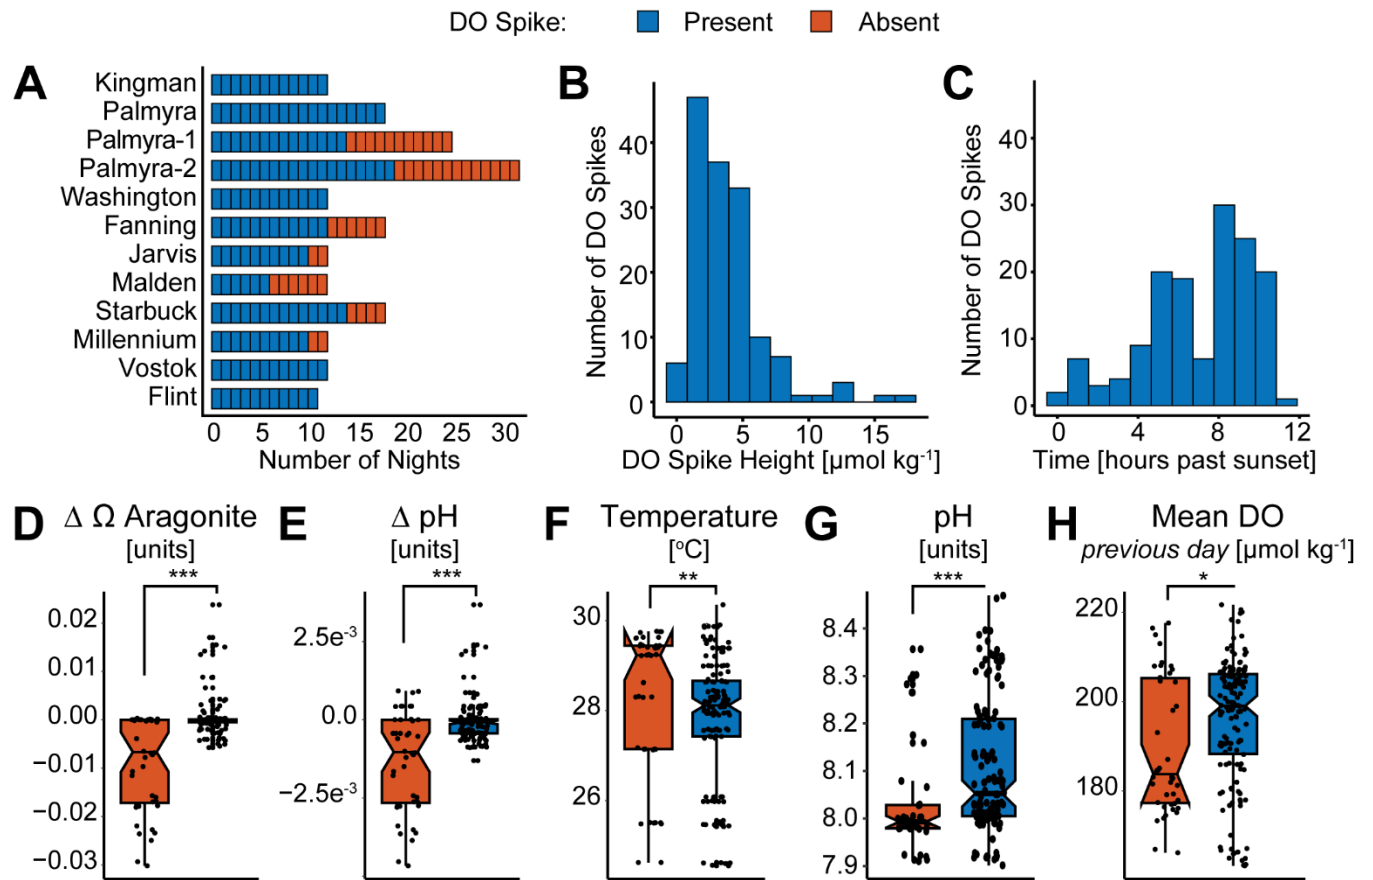

**Figure 2. The saturation state of aragonite ( $\Omega$  aragonite) is the most accurate predictor of nighttime dissolved oxygen spikes via random forests analysis.**

(A) Frequency of oxygen spike occurrence by night for each data set. ‘Palmyra-1’ and ‘Palmyra-2’ are calcifier and non-calcifier dominated sites, respectively from the Palmyra BEAMS data, island names are from the Line Islands cBIT deployments. The y-axis is ordered by decreasing latitude from top to bottom. (B-C) Histograms of binned oxygen spike heights and times. (D-H) Top five predictors for all data sets in the Line Islands (cBIT deployments and BEAMS) using site level and island level variables, as determined by mean decrease in accuracy and  $p$ -value  $< 0.05$ . Points represent the value at the time of a DO spike (D-G), or the mean value for the previous daylight period (H). Asterisks indicate significantly different means as determined by a Wilcoxon test. Thresholds: \*\*\* =  $p < 0.001$ ; \*\* =  $p < 0.01$ ; \* =  $p < 0.05$ ; ns = not significant. Out-of-box classification error rate = 4.6%.

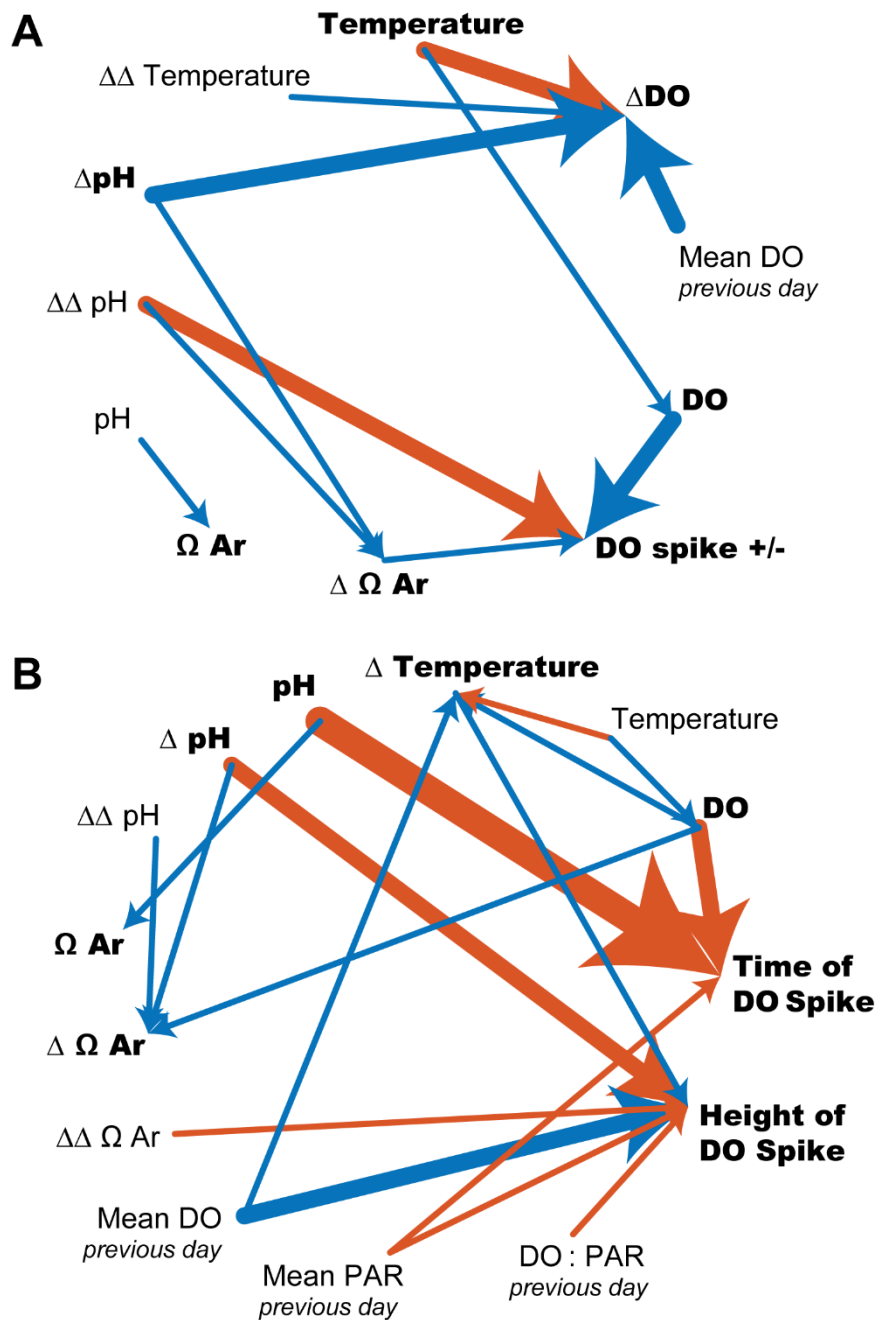

**Figure 3. Omega aragonite, pH and temperature all interact to predict DO spikes, excluding most other modeled variables.**

The response variables for each model are indicated in bold. Relationships with a p-value < 0.05 as determined by Kenward-Rogers approximation and an SEM coefficient >|1| are shown. Arrows point from predictor to response. Thicker lines indicate stronger relationships as determined by the absolute value of the SEM coefficient. Orange lines indicate a negative effect,

blue indicates positive. (A) Classification of DO spike presence/absence. (B) Prediction via regression of DO spike height and time

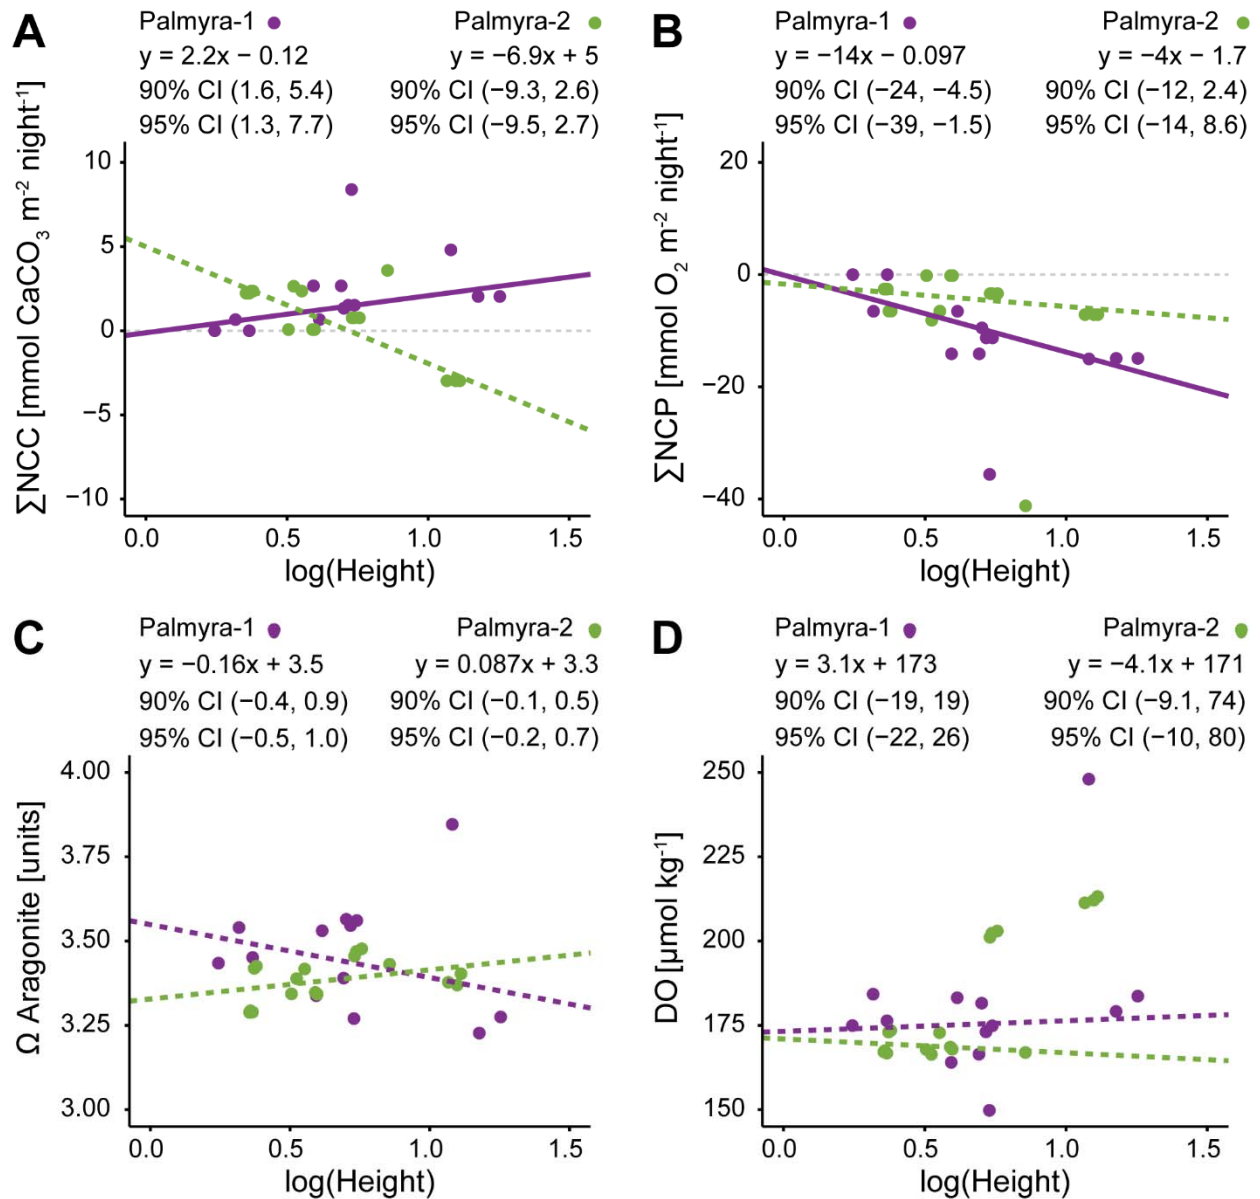

**Figure 4. Net community calcification increases as oxygen spike height increases at a calcifier-dominated site (Palmyra-1), while the opposite is true for net community production.**

Robust regression analysis of log transformed oxygen spike heights and (A) nightly sums of NCC, (B) nightly sums of NCP, (C) saturation state of aragonite, and (D) oxygen concentration

for the Palmyra BEAMS dataset. Dotted lines indicate non-significant regressions due to the inclusion of zero in both confidence intervals.

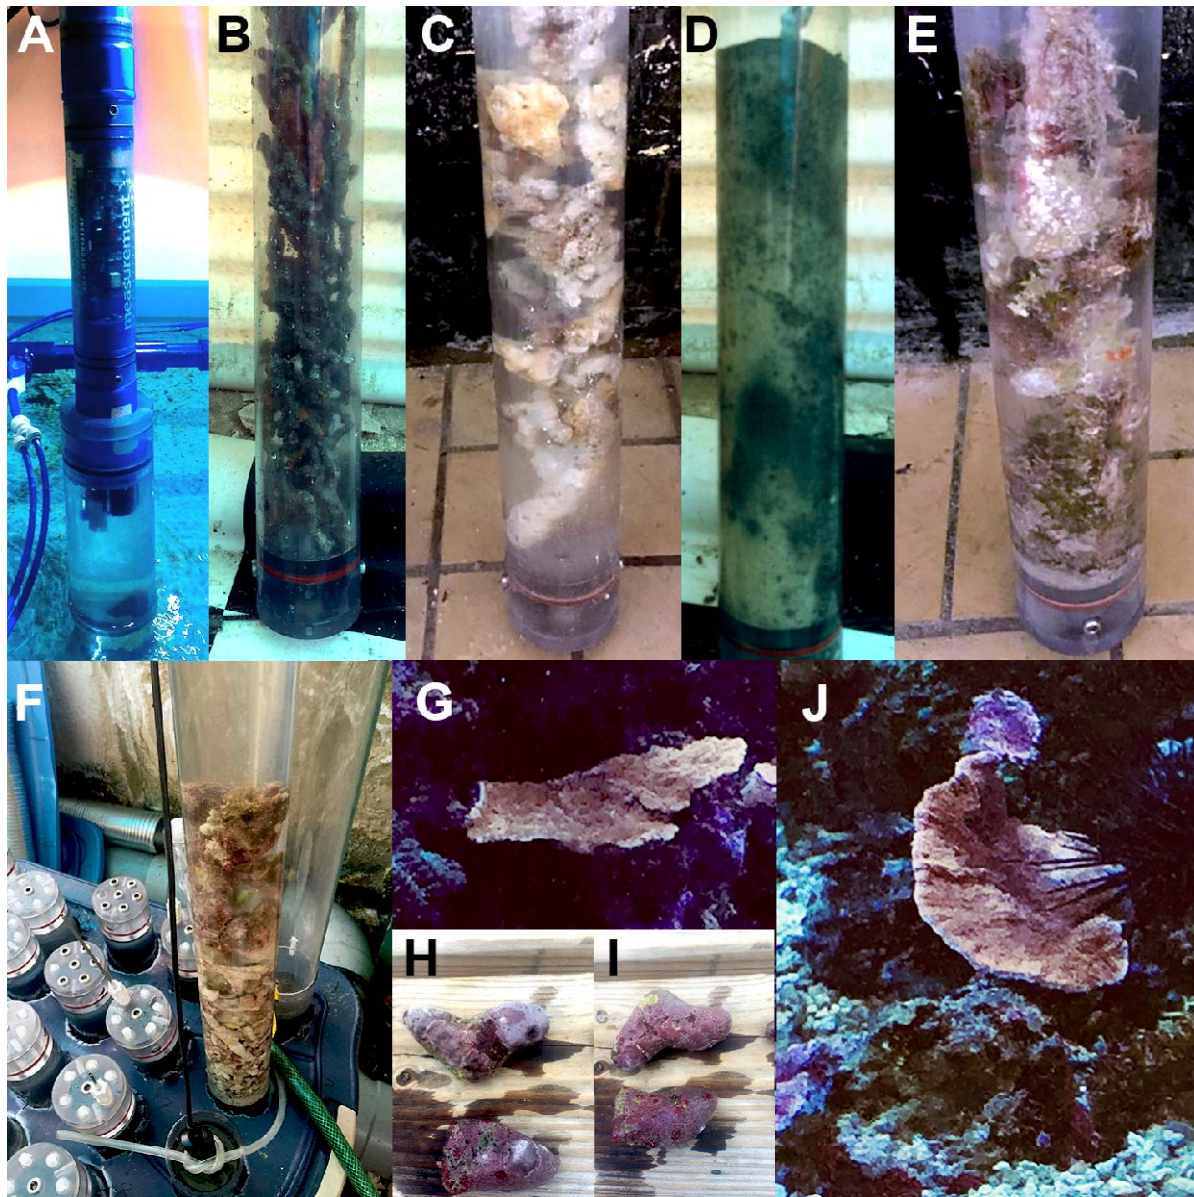

**Figure 5. Controlled incubations were performed using wild collected and aquacultured reef organisms.**

(A) Position of MANTA sonde in fully sealed incubations. The incubation chamber pictured is smaller than those used in this study. (B – E) Wild collected turf, bare rubble, sediment and turf samples. (F) Layout of incubation chambers in water bath showing lids with access ports and a HACH probe in use (chamber without lid at bottom). (G & J) Aquacultured *Montipora capricornis* specimens before removal for incubation, approx. 10 cm long, 7 cm wide and 0.5 cm thick each. (H & I) Wild collected CCA specimens from intertidal zone, approx. 5 cm long, 3 cm wide and 2 cm thick each.

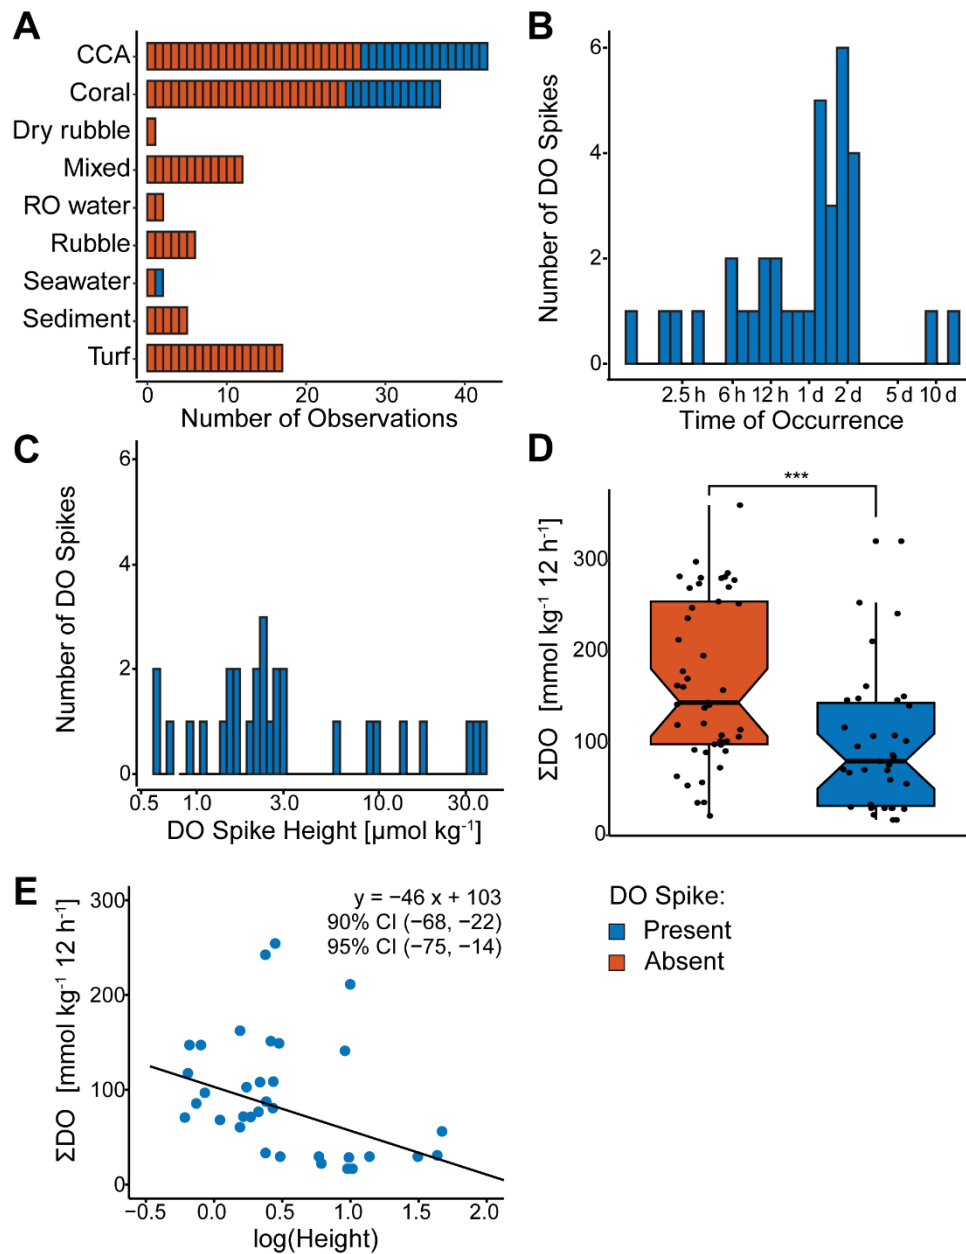

**Figure 6. Analyses of incubation data show net community production (as total oxygen production) decreases as oxygen spike height increases in controlled incubations.**

(A) Frequency of oxygen spike occurrence for each organism incubated. (B-C) Histograms of binned oxygen spike heights and times. (D) Asterisks indicate significantly different means as determined by a Wilcoxon test. Thresholds: \*\*\* =  $p < 0.001$ ; \*\* =  $p < 0.01$ ; \* =  $p < 0.05$ ; ns = not significant. (E) The linear formula obtained by robust regression is listed on each plot, as well as the 90% and 95% confidence intervals obtained via bootstrap of robust regression.
